# Supplementary material for: The role of secondary metabolites in the production of CuO nanoparticles by fungi: a physiological and metabolic approach
Source: Royal Society of Chemistry journal article supplement (doi:10.1039/d4en00403e), 2024-01-01
Supplement: d4en00403e1.pdf [file d4en00403e1.pdf]

## *Supporting information*

### **The role of secondary metabolites in the production of CuO nanoparticles by fungi: A physiological and metabolic approach**

Ying Zhou<sup>1,2</sup>, Hang N. Nguyen<sup>2</sup>, Janire Peña-Bahamonde<sup>2</sup>, Francisco C. Robles-Hernandez<sup>3,4</sup>,

Luciana Jandelli Gimenes<sup>5</sup>, Debora F. Rodrigues<sup>2,4\*</sup>

<sup>1</sup> Department of Materials Chemistry, Huzhou College, Huzhou 313000, P. R. China

<sup>2</sup> Department of Civil and Environmental Engineering, University of Houston, Houston, TX  
77204-4003,  
U.S.A.

<sup>3</sup> Department of Mechanical Engineering Technology, University of Houston, Houston, TX  
77204-4020,  
U.S.A.

<sup>4</sup> Department of Material Science and Engineering, University of Houston, Houston, TX  
77204-4003,  
U.S.A.

<sup>5</sup> Center for Environmental Research and Training, University of São Paulo, Cubatão, São  
Paulo 11540-  
990, Brazil

\*Corresponding authors: [dfrigirodrigues@uh.edu](mailto:dfrigirodrigues@uh.edu), phone: +1-713-743-1495

## Supplementary Methods

**X-ray photoelectron spectroscopy (XPS) Testing for biosynthesized CuONPs:** XPS measurement was performed using PHI 5700, which was equipped with an Electronic Supplementary Material (ESI) for Chemical Communications monochromatic Al K $\alpha$  X-ray source ( $h\nu = 1486.7$  eV) incident at  $90^\circ$  relative to the axis of a hemispherical energy analyzer. Spectrometer measurement was performed in both high and low resolutions with pass energies of 23.5 and 187.85 eV, respectively. A photoelectron take-off angle of  $45^\circ$  from the surface, and analyzer spot diameter of 1.1 mm was used. The survey spectra were carried out at the energies from 1 to 1400 eV, and a high resolution spectrum was collected for photoelectron emitted for Cu 1s and O 1s. All spectra were collected at room temperature with a base pressure of  $1 \times 10^{-8}$  torr. Electron binding energies were calibrated with respect to the C 1s line at 284.8 eV. Data processing was performed using PHI Multipak software (version 7.0A). The high-resolution data was first analyzed by background subtraction using the Shirley routine and a subsequent nonlinear fitting to mixed Gaussian-Lorentzian functions. Atomic compositions were derived from the high-resolution scans. Peak areas were obtained after subtraction of the integrated baseline and corrected for sensitivity factors.

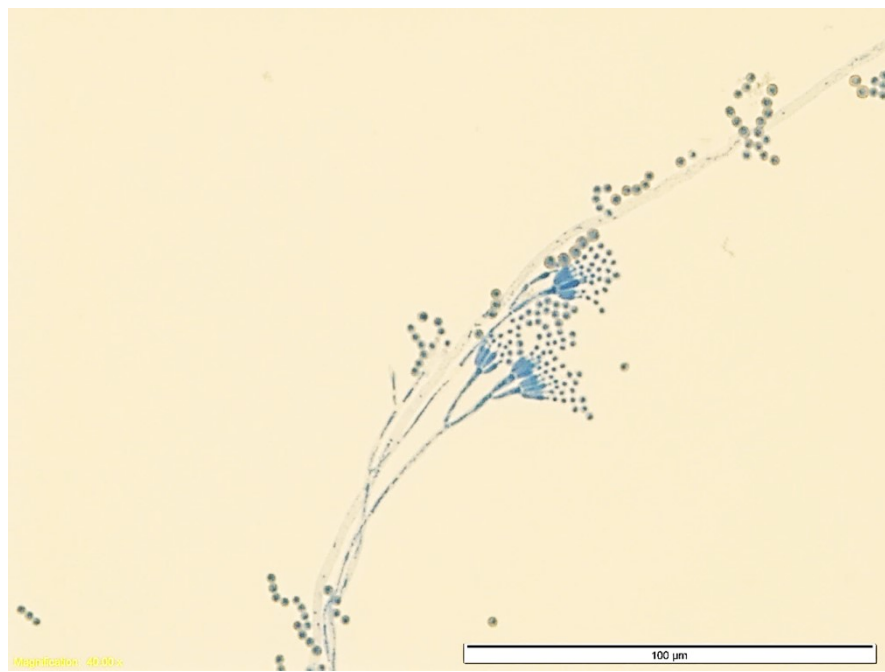

**Figure S1.** The morphologic characteristic of *Penicillium* spp.

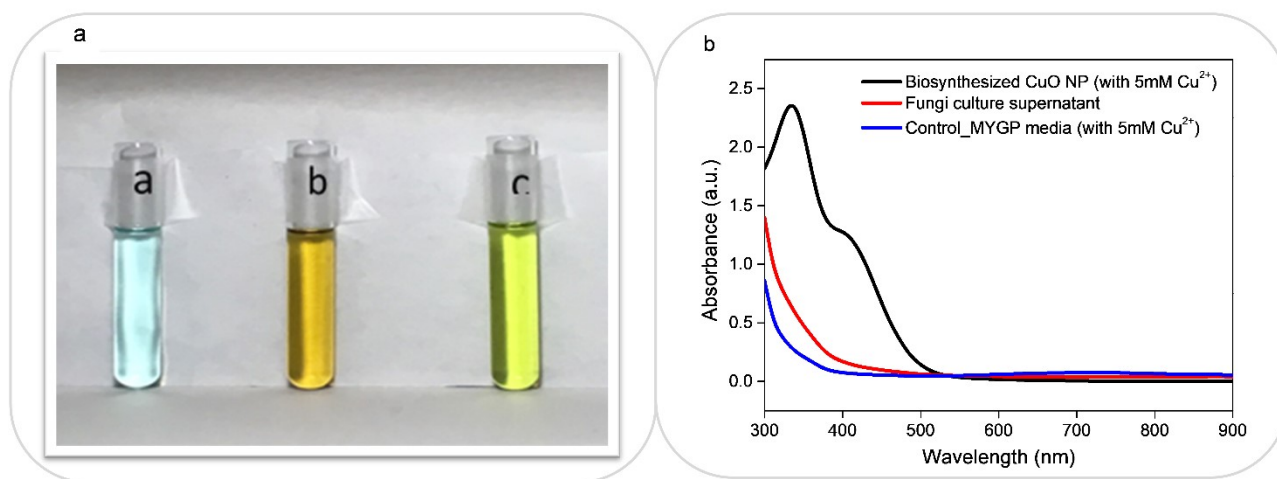

**Figure S2. (a)** Tube a, b, c represents Fungal growth supernatant (control), MYGP media with 5 mM Cu<sup>2+</sup> (control) and biosynthesized CuONPs respectively. **(b)** UV vis measurement of CuONPs sample and controls.

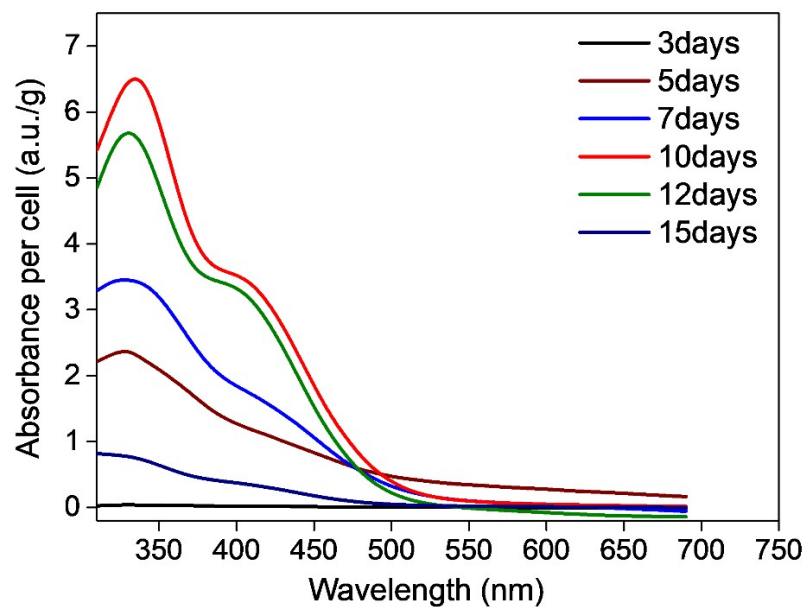

**Figure S3. Effects of fungal age on CuONPs synthesis.** The absorbance at 330nm was normalized to fungal dried biomass.

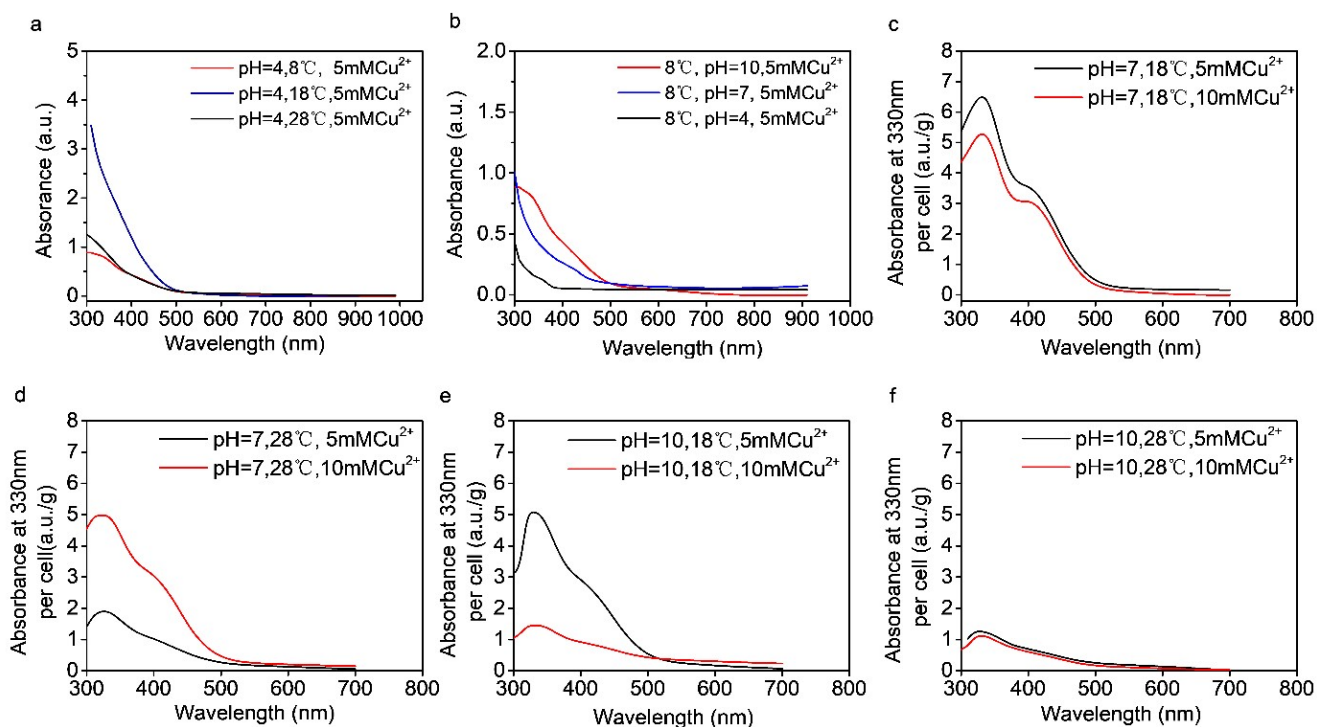

**Figure S4. UV-vis measurement of CuONPs samples:** Average UV absorption peak (at 330nm) in the cell-free supernatant of fungi with different testing pH, temperatures and copper dosage. **(a)** No UV absorption peak for the CuONPs synthesized at pH=4,  $C_{Cu^{2+}} = 5 \text{ mM}$ ,  $T = 8^\circ\text{C}, 18^\circ\text{C}, 28^\circ\text{C}$ . **(b)** No UV absorption peak for the CuONPs synthesized at  $8^\circ\text{C}$  under different testing pH and copper concentration. **(c)** The CuONP samples synthesized at pH=7,  $T=18^\circ\text{C}$ ,  $C_{Cu^{2+}} = 5 \text{ mM}, 10 \text{ mM}$ . **(d)** The CuO samples synthesized at pH=7,  $T=28^\circ\text{C}$ ,  $C_{Cu^{2+}} = 5 \text{ mM}, 10 \text{ mM}$ . **(e)** The CuO samples synthesized at pH=10,  $T=28^\circ\text{C}$ ,  $C_{Cu^{2+}} = 5 \text{ mM}, 10 \text{ mM}$ . **(f)** The CuO samples synthesized

at pH=10, T=28°C,  $C_{Cu^{2+}} = 5 \text{ mM}, 10 \text{ mM}$ . The absorbance peaks (Fig. S5. e - f) were normalized to the fungal dried mass.

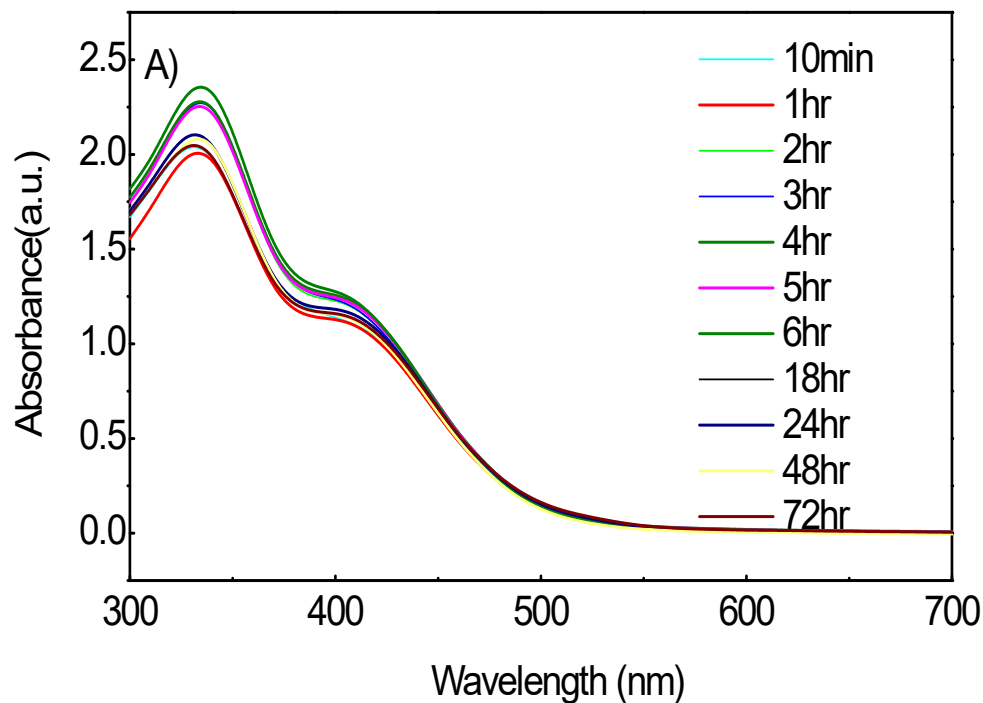

**Figure S5. Effects of synthesis time on CuONPs synthesis.** (a) Spectra with the 330 nm peak, characteristic peak of CuONPs at 18°C, pH = 7 and 5 mM  $Cu^{2+}$ . The absorbance was normalized to the dried fungal mass.

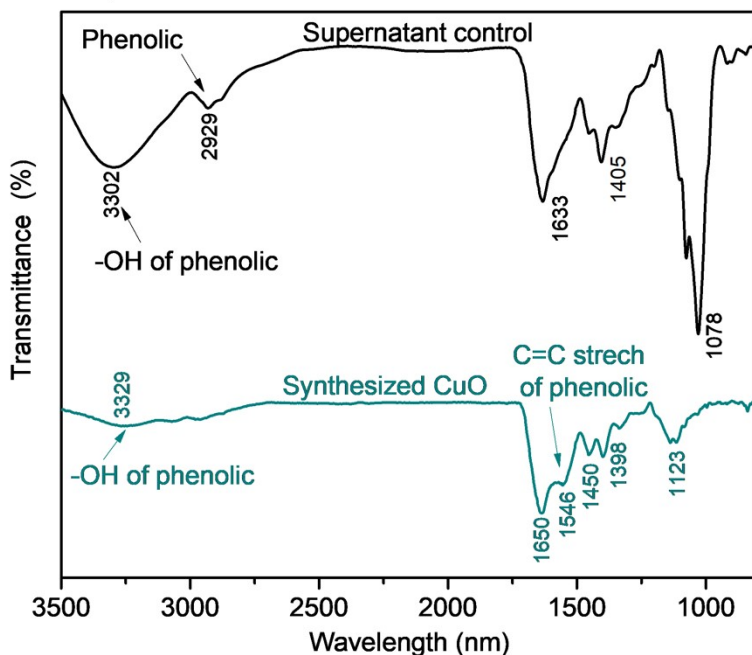

Figure S6. FT-IR spectrum of the biosynthesized CuO nanoparticles (before and after bio-reduction)

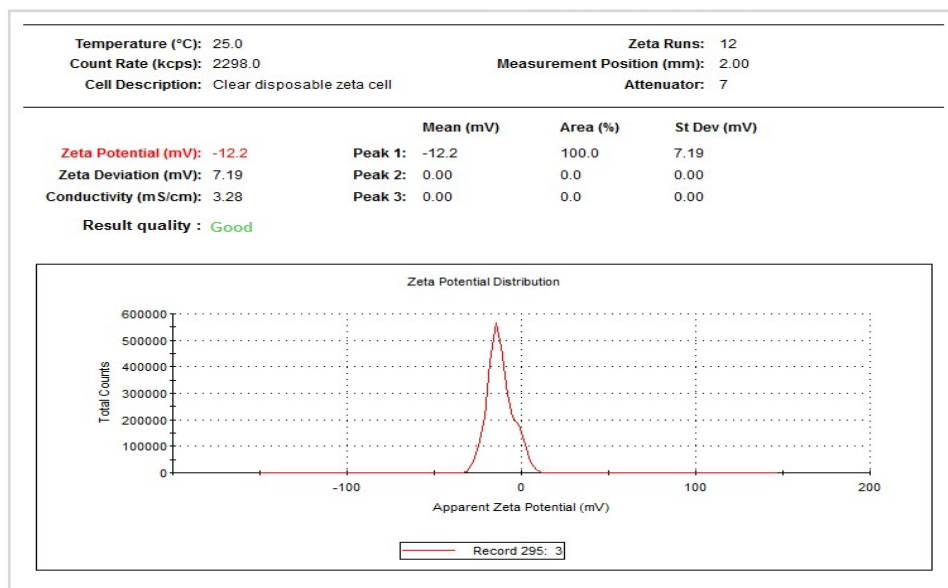

Figure S7. Zeta potential analysis of biosynthesized CuO nanoparticles

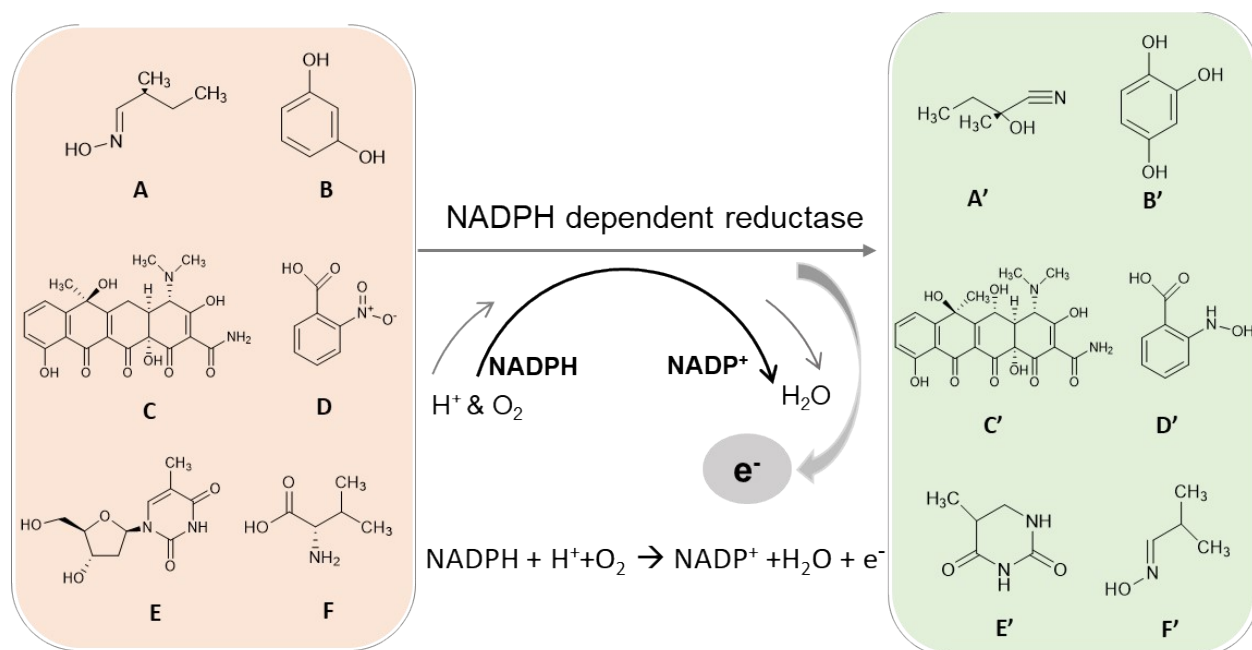

**Figure S8.** NADPH-dependent oxidoreductase enzymatic reactions involve donating electrons to copper ions: detailed electron transfer reactions

## Supplementary Tables

**Table S1. Profiling metabolites data based on Thermo LC-MS/MS based profiling analysis** (including total 257 metabolic components (169 ESI(+)) and 88ESI(-) components) from MYGP supernatant and 33 of 257 compounds (23 ESI(+)) and 11ESI(-) components) from PDB supernatant, in negative mode (ESI (-), Table S.1 A) and in positive mode (ESI (+), Table S.1B) respectively).

**Table S1 a. Negative ion mode ESI (-) compounds:** 88 components in MYGP and 11compounds in PDB supernatant, P-value <0.005 and Fold change >2.

| Name                                                                                                   | Formula                                                                                                       | Molecular Weight                                                | RT [min] | Area (Max.) |          |
|--------------------------------------------------------------------------------------------------------|---------------------------------------------------------------------------------------------------------------|-----------------------------------------------------------------|----------|-------------|----------|
| <b>88 of 105 components in MYGP media identified based on P-value &lt;0.005 and Fold change &gt; 2</b> |                                                                                                               |                                                                 |          |             |          |
| 1                                                                                                      | 2,2'-Iminobis (4-hydroxybenzoic acid)                                                                         | C <sub>14</sub> H <sub>11</sub> NO <sub>6</sub>                 | 289.0591 | 5.703       | 1.13E+08 |
| 2                                                                                                      | 3-(3-formyl-4-hydroxy-5-nitrophenyl)benzoic acid                                                              | C <sub>14</sub> H <sub>9</sub> NO <sub>6</sub>                  | 287.0434 | 3.555       | 57753498 |
| 3                                                                                                      | Gluconic acid                                                                                                 | C <sub>6</sub> H <sub>12</sub> O <sub>7</sub>                   | 196.0584 | 0.857       | 54183351 |
| 4                                                                                                      | Diethyl nitromalonate/Cyanoglucoside                                                                          | C <sub>7</sub> H <sub>11</sub> NO <sub>6</sub>                  | 205.0587 | 0.876       | 20997863 |
| 5                                                                                                      | YWA1                                                                                                          | C <sub>14</sub> H <sub>12</sub> O <sub>6</sub>                  | 276.0638 | 5.979       | 11711000 |
| 6                                                                                                      | 3-Methyl-2-buten-1-yl (2E)-3-(3,4-dihydroxyphenyl)acrylate                                                    | C <sub>14</sub> H <sub>16</sub> O <sub>4</sub>                  | 248.1052 | 8.973       | 10564821 |
| 7                                                                                                      | N-Acetyl-DL-norvaline?                                                                                        | C <sub>7</sub> H <sub>13</sub> N <sub>2</sub> O <sub>3</sub>    | 159.0897 | 2.72        | 8117219  |
| 8                                                                                                      | Thymidine                                                                                                     | C <sub>10</sub> H <sub>14</sub> N <sub>2</sub> O <sub>5</sub>   | 242.0906 | 2.555       | 7805096  |
| 9                                                                                                      | NA                                                                                                            | C <sub>14</sub> H <sub>9</sub> NO <sub>6</sub>                  | 287.0434 | 2.333       | 7783231  |
| 10                                                                                                     | leucodelphinidin                                                                                              | C <sub>15</sub> H <sub>14</sub> O <sub>8</sub>                  | 322.0692 | 4.642       | 7657316  |
| 11                                                                                                     | Propanoic acid, 2,2-dimethyl-4-(chlorosulfonyl)-2-[2-(2-pyridinyl)diazenyl]-1-naphthalenyl ester              | C <sub>20</sub> H <sub>18</sub> ClN <sub>3</sub> O <sub>4</sub> | 399.1063 | 0.85        | 7430631  |
| 12                                                                                                     | Benzeneacetic acid, a-[(4-nitrobenzoyl)oxy]-                                                                  | C <sub>15</sub> H <sub>11</sub> NO <sub>6</sub>                 | 301.0591 | 1.918       | 7008825  |
| 13                                                                                                     | 1-Butanone, 4-[(3,5-dinitrobenzoyl)oxy]-2-methyl-1-phenyl-                                                    | C <sub>18</sub> H <sub>16</sub> N <sub>2</sub> O <sub>7</sub>   | 372.0961 | 2.061       | 5591425  |
| 14                                                                                                     | NA                                                                                                            | C <sub>14</sub> H <sub>22</sub> N <sub>4</sub> O <sub>6</sub>   | 342.1543 | 1.303       | 5470632  |
| 15                                                                                                     | Digallic acid                                                                                                 | C <sub>14</sub> H <sub>10</sub> O <sub>9</sub>                  | 322.0328 | 4.442       | 4336288  |
| 16                                                                                                     | Medronic Acid                                                                                                 | CH <sub>6</sub> O <sub>6</sub> P <sub>2</sub>                   | 175.9635 | 0.677       | 3686323  |
| 17                                                                                                     | ophthalmic acid                                                                                               | C <sub>11</sub> H <sub>19</sub> N <sub>3</sub> O <sub>6</sub>   | 289.1279 | 2.242       | 3575528  |
| 18                                                                                                     | NA                                                                                                            | C <sub>23</sub> H <sub>23</sub> N <sub>8</sub> O <sub>5</sub> P | 522.1533 | 7.147       | 3525633  |
| 19                                                                                                     | Uracil                                                                                                        | C <sub>4</sub> H <sub>4</sub> N <sub>2</sub> O <sub>2</sub>     | 112.0274 | 1.174       | 3315725  |
| 20                                                                                                     | Exifone                                                                                                       | C <sub>13</sub> H <sub>10</sub> O <sub>7</sub>                  | 278.043  | 2.62        | 3123835  |
| 21                                                                                                     | 3-(4-Chlorobenzoyl)propionic acid/Ethyl 4-chlorobenzoylformate                                                | C <sub>10</sub> H <sub>9</sub> ClO <sub>3</sub>                 | 212.0243 | 6.876       | 3043124  |
| 22                                                                                                     | 1,4-Naphthalenedione,2,3,5,6,8-pentahydroxy                                                                   | C <sub>10</sub> H <sub>6</sub> O <sub>7</sub>                   | 238.0117 | 4.467       | 2660346  |
| 23                                                                                                     | nicotianamine                                                                                                 | C <sub>12</sub> H <sub>21</sub> N <sub>3</sub> O <sub>6</sub>   | 303.1434 | 3.321       | 2611136  |
| 24                                                                                                     | Baicalin                                                                                                      | C <sub>21</sub> H <sub>18</sub> O <sub>11</sub>                 | 446.0855 | 4.958       | 2077304  |
| 25                                                                                                     | APM                                                                                                           | C <sub>7</sub> H <sub>13</sub> NO <sub>4</sub>                  | 175.0846 | 1.797       | 2057495  |
| 26                                                                                                     | Methyl alpha-D-mannopyranoside                                                                                | C <sub>7</sub> H <sub>14</sub> O <sub>6</sub>                   | 194.0791 | 1.09        | 1981482  |
| 27                                                                                                     | NA                                                                                                            | C <sub>29</sub> H <sub>22</sub> N <sub>4</sub> O <sub>8</sub>   | 554.1434 | 7.051       | 1962932  |
| 28                                                                                                     | L-Alanine,N-(3,5-dimethyl-4-isoxazolyl)-N-(methoxymethyl)-                                                    | C <sub>11</sub> H <sub>18</sub> N <sub>2</sub> O <sub>4</sub>   | 242.127  | 4.315       | 1937528  |
| 29                                                                                                     | Hydroxyhydroquinone                                                                                           | C <sub>6</sub> H <sub>6</sub> O <sub>3</sub>                    | 126.0318 | 3.261       | 1900930  |
| 30                                                                                                     | Salicylic acid, 5-nitro-                                                                                      | C <sub>7</sub> H <sub>5</sub> NO <sub>5</sub>                   | 183.017  | 2.482       | 1816275  |
| 31                                                                                                     | propionylcarnitine                                                                                            | C <sub>10</sub> H <sub>19</sub> NO <sub>4</sub>                 | 217.1315 | 5.807       | 1804273  |
| 32                                                                                                     | Pseudouridine                                                                                                 | C <sub>9</sub> H <sub>12</sub> N <sub>2</sub> O <sub>6</sub>    | 244.0698 | 1.115       | 1795235  |
| 33                                                                                                     | (3S,4R)-3,4,5-Trihydroxy-4'-oxo-3',4,4',5'-tetrahydro-2'H,3H-spiro[furan-2,1'-naphthalene]-6'-carboxylic acid | C <sub>14</sub> H <sub>14</sub> O <sub>7</sub>                  | 294.0745 | 3.944       | 1762356  |



|    |                                                                                                               |                                                                            |          |       |          |
|----|---------------------------------------------------------------------------------------------------------------|----------------------------------------------------------------------------|----------|-------|----------|
| 34 | Pantothenic acid                                                                                              | C <sub>9</sub> H <sub>17</sub> NO <sub>5</sub>                             | 219.1109 | 2.841 | 1642913  |
| 35 | NA                                                                                                            | C <sub>10</sub> H <sub>15</sub> N <sub>3</sub> O <sub>6</sub>              | 273.0965 | 1.276 | 1637613  |
| 36 | NA                                                                                                            | C <sub>20</sub> H <sub>41</sub> N <sub>4</sub> O <sub>11</sub> P           | 544.2501 | 3.991 | 1634531  |
| 37 | NA                                                                                                            | C <sub>27</sub> H <sub>43</sub> N <sub>3</sub> O <sub>14</sub>             | 633.2765 | 3.742 | 1611164  |
| 38 | (Z)-3-butylidenephthalide                                                                                     | C <sub>12</sub> H <sub>12</sub> O <sub>2</sub>                             | 188.0838 | 5.979 | 1564355  |
| 39 | Oxagrelate                                                                                                    | C <sub>14</sub> H <sub>16</sub> N <sub>2</sub> O <sub>4</sub>              | 276.1116 | 4.843 | 1465053  |
| 40 | Naphtho[2,3-c] furan-4,9-dione,5,6,8-trihydroxy-3-methoxy-1-methyl-                                           | C <sub>14</sub> H <sub>10</sub> O <sub>7</sub>                             | 290.0432 | 4.319 | 1457814  |
| 41 | 2-Naphthalenebutanoic acid                                                                                    | C <sub>14</sub> H <sub>16</sub> O <sub>4</sub>                             | 248.1052 | 7.09  | 1428814  |
| 42 | NA                                                                                                            | C <sub>15</sub> H <sub>20</sub> N <sub>8</sub> O <sub>3</sub>              | 360.1652 | 2.304 | 1405539  |
| 43 | Benserazide                                                                                                   | C <sub>10</sub> H <sub>15</sub> N <sub>3</sub> O <sub>5</sub>              | 257.1016 | 1.339 | 1389387  |
| 44 | N-Acetyl-L-phenylalanine                                                                                      | C <sub>11</sub> H <sub>13</sub> NO <sub>3</sub>                            | 207.0897 | 4.992 | 1388527  |
| 45 | YWA1                                                                                                          | C <sub>14</sub> H <sub>12</sub> O <sub>6</sub>                             | 276.0638 | 6.615 | 1359808  |
| 46 | 1-(4-Acetoxy-3-methoxyphenyl)-2-propen-1-yl acetate                                                           | C <sub>14</sub> H <sub>16</sub> O <sub>5</sub>                             | 264.1001 | 6.068 | 1358584  |
| 47 | NA                                                                                                            | C <sub>5</sub> H <sub>5</sub> N <sub>6</sub> P <sub>3</sub> S <sub>2</sub> | 305.9217 | 0.697 | 1316302  |
| 48 | Trolox                                                                                                        | C <sub>14</sub> H <sub>18</sub> O <sub>4</sub>                             | 250.1208 | 7.106 | 1291172  |
| 49 | 1-Pentofuranosyl-2,4(1H,3H)-pyrimidinedione                                                                   | C <sub>9</sub> H <sub>12</sub> N <sub>2</sub> O <sub>6</sub>               | 244.0697 | 1.355 | 1287893  |
| 50 | 3-Allyl-2-hydroxybenzoic acid                                                                                 | C <sub>10</sub> H <sub>10</sub> O <sub>3</sub>                             | 178.0631 | 6.908 | 1217670  |
| 51 | 3-{(2E)-4-Methoxy-4-oxo-2-butenoyl}amino}-L-alanine                                                           | C <sub>8</sub> H <sub>12</sub> N <sub>2</sub> O <sub>5</sub>               | 216.0749 | 1.203 | 1155935  |
| 52 | Dimethyl chloroterephthalate                                                                                  | C <sub>10</sub> H <sub>9</sub> ClO <sub>4</sub>                            | 228.0193 | 4.854 | 1111701  |
| 53 | 2-Furanpropanoic acid,5-(2-nitrophenyl)-b-oxo-                                                                | C <sub>15</sub> H <sub>13</sub> NO <sub>6</sub>                            | 303.0747 | 6.074 | 1105503  |
| 54 | Furo[3,4-e]-1,3-benzodioxole-6-carboxylic acid, 6,8-dihydro-8-oxo-                                            | C <sub>10</sub> H <sub>6</sub> O <sub>6</sub>                              | 222.0166 | 3.914 | 1058333  |
| 55 | 1-[(2'-Methoxyethyl)amino]-2-nitro-4-[di-(2'-hydroxyethyl)amino]benzene                                       | C <sub>13</sub> H <sub>21</sub> N <sub>3</sub> O <sub>5</sub>              | 299.1485 | 4.419 | 978503   |
| 56 | (1R)-1,5-Anhydro-6-deoxy-1-(1-hydroxy-10,12-dimethoxy-6-oxo-8-vinyl-6H-dibenzo[c,h]chromen-4-yl)-D-galactitol | C <sub>27</sub> H <sub>26</sub> O <sub>9</sub>                             | 494.1584 | 7.17  | 920786.4 |
| 57 | YWA1                                                                                                          | C <sub>14</sub> H <sub>12</sub> O <sub>6</sub>                             | 276.0638 | 4.866 | 891412.9 |
| 58 | Butanedioic acid,1-[2-(3-carboxy-1-oxopropyl)hydrazide                                                        | C <sub>8</sub> H <sub>12</sub> N <sub>2</sub> O <sub>6</sub>               | 232.0698 | 1.203 | 865566.7 |
| 59 | NA                                                                                                            | C <sub>22</sub> H <sub>39</sub> O <sub>7</sub> P <sub>3</sub> S            | 540.164  | 7.203 | 829216.4 |
| 60 | Maraniol                                                                                                      | C <sub>12</sub> H <sub>12</sub> O <sub>3</sub>                             | 204.0788 | 5.979 | 827914.9 |
| 61 | Piracetam                                                                                                     | C <sub>6</sub> H <sub>10</sub> N <sub>2</sub> O <sub>2</sub>               | 142.0744 | 1.172 | 824855.9 |
| 62 | 1-Allyl-2,3,4,5-tetramethoxybenzene                                                                           | C <sub>13</sub> H <sub>18</sub> O <sub>4</sub>                             | 238.1208 | 6.861 | 761110.3 |
| 63 | 1,1'-(2,4,6-Trihydroxy-1,3-phenylene)diethanone                                                               | C <sub>10</sub> H <sub>10</sub> O <sub>5</sub>                             | 210.053  | 4.531 | 751655   |
| 64 | NA                                                                                                            | C <sub>9</sub> H <sub>20</sub> N <sub>7</sub> O <sub>9</sub> P             | 401.1059 | 0.849 | 740350.6 |
| 65 | Itaconic acid                                                                                                 | C <sub>5</sub> H <sub>6</sub> O <sub>4</sub>                               | 130.0268 | 0.855 | 714730.5 |
| 66 | Aminolevulinic acid                                                                                           | C <sub>5</sub> H <sub>9</sub> NO <sub>3</sub>                              | 131.0584 | 1.486 | 661808.1 |
| 67 | cytarabine                                                                                                    | C <sub>9</sub> H <sub>13</sub> N <sub>3</sub> O <sub>5</sub>               | 243.0858 | 1.313 | 651414   |
| 68 | NA                                                                                                            | C <sub>12</sub> H <sub>17</sub> N <sub>3</sub> O <sub>7</sub>              | 315.1072 | 1.905 | 642143.6 |

|    |                                                                                          |                                                                              |          |       |          |
|----|------------------------------------------------------------------------------------------|------------------------------------------------------------------------------|----------|-------|----------|
| 69 | alpha-Glutamyl-4-hydroxyproline                                                          | C <sub>10</sub> H <sub>16</sub> N <sub>2</sub> O <sub>6</sub>                | 260.1011 | 0.918 | 627082.2 |
| 70 | NA                                                                                       | C <sub>28</sub> H <sub>25</sub> N <sub>4</sub> O <sub>4</sub> P <sub>3</sub> | 574.1093 | 5.98  | 620349.8 |
| 71 | UNII:PP1L5D6A0Y                                                                          | C <sub>12</sub> H <sub>16</sub> O <sub>4</sub>                               | 224.1052 | 6.651 | 606378.2 |
| 72 | Maclurin monohydrate                                                                     | C <sub>13</sub> H <sub>12</sub> O <sub>7</sub>                               | 280.0587 | 6.31  | 540689.3 |
| 73 | Methyl-2-acetamido-3 (3,4 diacetoxy- phenyl)-2-propenoate                                | C <sub>16</sub> H <sub>17</sub> NO <sub>7</sub>                              | 335.101  | 5.578 | 540064.3 |
| 74 | 1-[N-(g-L-Glutamyl)amino]-D-proline                                                      | C <sub>10</sub> H <sub>17</sub> N <sub>3</sub> O <sub>5</sub>                | 259.1171 | 0.928 | 535979.9 |
| 75 | Ferulic acid?                                                                            | C <sub>10</sub> H <sub>10</sub> O <sub>4</sub>                               | 194.058  | 4.697 | 534153.1 |
| 76 | 6-Methoxy-2-oxo-2H-chromen-7-yl acetate                                                  | C <sub>12</sub> H <sub>10</sub> O <sub>5</sub>                               | 234.0531 | 4.951 | 523244.3 |
| 77 | 4-hydroxy-4-(indol-3-ylmethyl)glutamic acid                                              | C <sub>14</sub> H <sub>16</sub> N <sub>2</sub> O <sub>5</sub>                | 292.1064 | 3.339 | 519229.4 |
| 78 | [(2S)-2-acetyloxy-3-[2-(6-aminohexanoylamino) ethoxyhydroxyphosphoryl]oxypropyl] acetate | C <sub>15</sub> H <sub>29</sub> N <sub>2</sub> O <sub>9</sub> P              | 412.1599 | 2.746 | 512602.8 |
| 79 | 5-Aminovaleric acid                                                                      | C <sub>5</sub> H <sub>11</sub> NO <sub>2</sub>                               | 117.0791 | 2.72  | 483035.5 |
| 80 | N-{2-[(2-Amino-2-carboxyethyl)amino]-2-carboxyethyl}aspartic acid                        | C <sub>10</sub> H <sub>17</sub> N <sub>3</sub> O <sub>8</sub>                | 307.1019 | 0.816 | 469497.3 |
| 81 | Urea,N-nitroso-N,N'-bis(tetrahydro-2H-pyran-4-yl)-                                       | C <sub>11</sub> H <sub>19</sub> N <sub>3</sub> O <sub>4</sub>                | 257.1379 | 1.024 | 465906.9 |
| 82 | Dihydrouridine                                                                           | C <sub>9</sub> H <sub>14</sub> N <sub>2</sub> O <sub>6</sub>                 | 246.0854 | 1.138 | 433532.5 |
| 83 | DL-Glutamic acid                                                                         | C <sub>5</sub> H <sub>9</sub> NO <sub>4</sub>                                | 147.0533 | 1.059 | 410163.7 |
| 84 | NA                                                                                       | C <sub>12</sub> H <sub>23</sub> N <sub>4</sub> O <sub>8</sub> PS             | 414.0988 | 0.854 | 399529   |
| 85 | 1,1'-Thiobis(2-acetoacetoxyethane), TBEA.                                                | C <sub>12</sub> H <sub>18</sub> O <sub>6</sub> S                             | 290.0829 | 6.986 | 379089.3 |
| 86 | 1H-1,4,7-Triazonine-1,4,7-triaceticaci                                                   | C <sub>12</sub> H <sub>19</sub> N <sub>3</sub> O <sub>6</sub>                | 301.1277 | 0.93  | 368171.5 |
| 87 | Nicotianamine                                                                            | C <sub>12</sub> H <sub>21</sub> N <sub>3</sub> O <sub>6</sub>                | 303.1434 | 2.211 | 354792.4 |
| 88 | Diosmetin                                                                                | C <sub>16</sub> H <sub>12</sub> O <sub>6</sub>                               | 300.0638 | 6.986 | 333816.4 |

---

**11 of 105 components identified in PDB media based on P-value < 0.005 and Fold change >5**

---

|    |                                                                                                                                      |                                                               |          |       |          |
|----|--------------------------------------------------------------------------------------------------------------------------------------|---------------------------------------------------------------|----------|-------|----------|
| 1  | (2S)-3-Methyl-2-({[(3S,4S,5R)-2,3,4-trihydroxy-5-(hydroxymethyl)tetrahydro-2-furanyl]methyl}amino)butanoic acid (non-preferred name) | C <sub>11</sub> H <sub>21</sub> NO <sub>7</sub>               | 279.132  | 1.224 | 4103317  |
| 2  | DL-Tyrosine                                                                                                                          | C <sub>9</sub> H <sub>11</sub> NO <sub>3</sub>                | 181.074  | 1.632 | 1871530  |
| 3  | NA                                                                                                                                   | C <sub>6</sub> H <sub>7</sub> NO                              | 109.0529 | 2.746 | 1514189  |
| 4  | N-Tigloylglycine                                                                                                                     | C <sub>7</sub> H <sub>11</sub> NO <sub>3</sub>                | 157.0741 | 2.768 | 1062470  |
| 5  | Phenyl D-glucopyranosiduronic acid                                                                                                   | C <sub>12</sub> H <sub>14</sub> O <sub>7</sub>                | 270.0743 | 2.459 | 677165.4 |
| 6  | (2R,3S,4S,5R,8R,10R,11S,12S)-2,10-Bis(hydroxymethyl)-1,6,9,13-tetraoxadispiro[4.2.4.2]tetradecane-3,4,11,12-tetrol                   | C <sub>12</sub> H <sub>20</sub> O <sub>10</sub>               | 324.106  | 1.831 | 632431.4 |
| 7  | NA                                                                                                                                   | C <sub>17</sub> H <sub>14</sub> N <sub>6</sub>                | 302.1271 | 3.819 | 558412.4 |
| 8  | N-ethylmaleimide                                                                                                                     | C <sub>6</sub> H <sub>7</sub> NO <sub>2</sub>                 | 125.0478 | 2.72  | 553834.9 |
| 9  | Butanamide, N-(1,2-dihydro-8-methoxy-1,4-dimethyl-2-oxo-7-quinoliny)-3-oxo-                                                          | C <sub>16</sub> H <sub>18</sub> N <sub>2</sub> O <sub>4</sub> | 302.1271 | 3.961 | 427655.8 |
| 10 | 3-Hydroxypyridine?                                                                                                                   | C <sub>5</sub> H <sub>5</sub> NO                              | 95.0372  | 3.529 | 403433.1 |
| 11 | 1-Pyrrolidineaceticacid/1H-Imidazole                                                                                                 | C <sub>12</sub> H <sub>18</sub> N <sub>4</sub> O <sub>4</sub> | 282.1331 | 2.25  | 377713.7 |

---

**Table. S1 b.** Positive ion mode ESI (+) compounds:169 components from MYGP and 22 components from PDB supernatant, P-value <0.005 and Fold change >2

|                                                                                                          | Name                                                                                                          | Formula                                                          | Molecular Weight | RT [min] | Area (Max.) |
|----------------------------------------------------------------------------------------------------------|---------------------------------------------------------------------------------------------------------------|------------------------------------------------------------------|------------------|----------|-------------|
| <b>169 ESI (+) components in MYGP media identified based on P-value &lt;0.005 and Fold change &gt; 2</b> |                                                                                                               |                                                                  |                  |          |             |
| 1                                                                                                        | Acetic acid,2-[(2-nitronaphtho[2,1-b]furan-7-yl)oxy]-                                                         | C <sub>14</sub> H <sub>9</sub> NO <sub>6</sub>                   | 287.04293        | 3.943    | 1.63E+08    |
| 2                                                                                                        | 2,2'-Iminobis (4-hydroxybenzoic acid)                                                                         | C <sub>14</sub> H <sub>11</sub> NO <sub>6</sub>                  | 289.05856        | 6.114    | 62054389    |
| 3                                                                                                        | thr-asp                                                                                                       | C <sub>8</sub> H <sub>14</sub> N <sub>2</sub> O <sub>6</sub>     | 234.08528        | 1.056    | 61741960    |
| 4                                                                                                        | Aceglutamide                                                                                                  | C <sub>7</sub> H <sub>12</sub> N <sub>2</sub> O <sub>4</sub>     | 188.07984        | 1.06     | 59365303    |
| 5                                                                                                        | NA                                                                                                            | C <sub>12</sub> H <sub>27</sub> N <sub>2</sub> O <sub>7</sub> P  | 342.154          | 1.532    | 52084518    |
| 6                                                                                                        | NA                                                                                                            | C <sub>20</sub> H <sub>20</sub> N <sub>2</sub> O <sub>8</sub>    | 416.12206        | 2.102    | 33532141    |
| 7                                                                                                        | Diethyl nitromalonate                                                                                         | C <sub>7</sub> H <sub>11</sub> NO <sub>6</sub>                   | 205.05879        | 1.083    | 20885306    |
| 8                                                                                                        | 1,3-Dioxolane-4,4-diaceticacid, 5-oxo-, 4-(phenylmethyl) ester                                                | C <sub>14</sub> H <sub>14</sub> O <sub>7</sub>                   | 294.07393        | 5.971    | 20775534    |
| 9                                                                                                        | NA                                                                                                            | C <sub>22</sub> H <sub>14</sub> N <sub>6</sub> O <sub>5</sub>    | 442.10144        | 2.918    | 18449849    |
| 10                                                                                                       | Nicotinic acid                                                                                                | C <sub>6</sub> H <sub>5</sub> NO <sub>2</sub>                    | 123.03214        | 1.5      | 18200968    |
| 11                                                                                                       | 3-[(4-cyano-2-pyrimidin-2-ylpyrazol-3-yl)diazenyl]-2,6-dihydroxy-N-phenylbenzamide                            | C <sub>21</sub> H <sub>14</sub> N <sub>8</sub> O <sub>3</sub>    | 426.11789        | 2.226    | 17450904    |
| 12                                                                                                       | 2-(3,4-dihydroxy-2-nitrosophenyl)-4-(2,3,4-trihydroxyphenyl)cyclobutane-1,3-dione                             | C <sub>16</sub> H <sub>11</sub> NO <sub>8</sub>                  | 345.04856        | 2.188    | 15794519    |
| 13                                                                                                       | NA                                                                                                            | C <sub>26</sub> H <sub>33</sub> N <sub>2</sub> O <sub>13</sub> P | 612.17071        | 2.808    | 15773536    |
| 14                                                                                                       | 1-(4-Acetoxy-3-methoxyphenyl)-2-propen-1-yl acetate                                                           | C <sub>14</sub> H <sub>16</sub> O <sub>5</sub>                   | 264.09968        | 6.769    | 15437440    |
| 15                                                                                                       |                                                                                                               | C <sub>25</sub> H <sub>18</sub> N <sub>10</sub> O <sub>4</sub>   | 522.15262        | 7.49     | 14877961    |
| 16                                                                                                       | (2Z)-3-[4,5-Dihydroxy-2-(2-hydroxy-2-propanyl)-2,3-dihydro-1-benzofuran-7-yl] acrylic acid                    | C <sub>14</sub> H <sub>16</sub> O <sub>6</sub>                   | 280.0946         | 5.863    | 14265172    |
| 17                                                                                                       | (4aS,5aS,6S,12aR)-1,6,10,11,12a-pentahydroxy-6-methyl-3,12-dioxo-4,4a,5,5a-tetrahydro tetracene-2-carboxamide | C <sub>20</sub> H <sub>19</sub> NO <sub>8</sub>                  | 401.11107        | 4.742    | 13639537    |
| 18                                                                                                       |                                                                                                               | C <sub>19</sub> H <sub>18</sub> N <sub>2</sub> O <sub>5</sub>    | 354.12201        | 1.867    | 12391190    |
| 19                                                                                                       | Uracil?                                                                                                       | C <sub>4</sub> H <sub>4</sub> N <sub>2</sub> O <sub>2</sub>      | 112.02734        | 1.406    | 12217773    |
| 20                                                                                                       | N-Methylpyrrolidone                                                                                           | C <sub>5</sub> H <sub>9</sub> NO                                 | 99.06846         | 3.064    | 11887808    |
| 21                                                                                                       | 2,6-bis-(4,6-dimethoxy-pyrimidin-2-yl-oxy) benzoate                                                           | C <sub>20</sub> H <sub>20</sub> N <sub>4</sub> O <sub>8</sub>    | 444.12845        | 2.191    | 11519041    |
| 22                                                                                                       | 5-(acridin-9-ylamino)-4,6-dinitro-1,3-dihydrobenzimidazol-2-one                                               | C <sub>20</sub> H <sub>12</sub> N <sub>6</sub> O <sub>5</sub>    | 416.08564        | 2.335    | 11383728    |
| 23                                                                                                       | 6-nitro-2,3-bis(3-nitrophenyl)quinoxaline                                                                     | C <sub>20</sub> H <sub>11</sub> N <sub>5</sub> O <sub>6</sub>    | 417.06973        | 2.625    | 10660514    |
| 24                                                                                                       | 3-[(4-cyano-2-pyrimidin-2-ylpyrazol-3-yl)diazenyl]-2,6-dihydroxy-N-phenylbenzamide                            | C <sub>21</sub> H <sub>14</sub> N <sub>8</sub> O <sub>3</sub>    | 426.11771        | 2.425    | 10464478    |

|    |                                                                                                                                                  |                                                                                |           |       |          |
|----|--------------------------------------------------------------------------------------------------------------------------------------------------|--------------------------------------------------------------------------------|-----------|-------|----------|
| 25 | 2-amino-1-naphthalen-2-yl-6,7-dinitropyrrolo[3,2-b]quinoxaline-3-carbonitrile                                                                    | C <sub>21</sub> H <sub>11</sub> N <sub>7</sub> O <sub>4</sub>                  | 425.08599 | 1.628 | 10434899 |
| 26 | NA                                                                                                                                               | C <sub>25</sub> H <sub>35</sub> N <sub>4</sub> O <sub>11</sub> P               | 598.20248 | 2.493 | 10166246 |
| 27 | NA                                                                                                                                               | C <sub>22</sub> H <sub>14</sub> N <sub>6</sub> O <sub>7</sub>                  | 474.09124 | 2.865 | 9456515  |
| 28 | N,2-bis(3-nitrophenyl)quinazolin-4-amine                                                                                                         | C <sub>20</sub> H <sub>13</sub> N <sub>5</sub> O <sub>4</sub>                  | 387.09524 | 3.944 | 8701355  |
| 29 | 4-Hydroxy-6-methyl-2-pyrone                                                                                                                      | C <sub>6</sub> H <sub>6</sub> O <sub>3</sub>                                   | 126.03185 | 3.655 | 8190673  |
| 30 | ophthalmic acid                                                                                                                                  | C <sub>11</sub> H <sub>19</sub> N <sub>3</sub> O <sub>6</sub>                  | 289.12746 | 2.567 | 7842053  |
| 31 | NA                                                                                                                                               | C <sub>29</sub> H <sub>43</sub> N <sub>3</sub> O <sub>9</sub> P <sub>2</sub> S | 671.21863 | 2.473 | 7832949  |
| 32 | 4-Methylene-L-glutamic acid                                                                                                                      | C <sub>6</sub> H <sub>9</sub> NO <sub>4</sub>                                  | 159.05333 | 1.083 | 7452647  |
| 33 | na                                                                                                                                               | C <sub>17</sub> H <sub>7</sub> N <sub>5</sub> O <sub>4</sub>                   | 345.04866 | 2.273 | 6734179  |
| 34 | 2-[3-(benzotriazol-2-yl)-2-hydroxyphenyl]-6-nitrobenzo[de]isoquinoline-1,3-dione                                                                 | C <sub>24</sub> H <sub>13</sub> N <sub>5</sub> O <sub>5</sub>                  | 451.09068 | 3.596 | 6602125  |
| 35 | NA                                                                                                                                               | C <sub>20</sub> H <sub>20</sub> N <sub>2</sub> O <sub>9</sub>                  | 432.11675 | 1.505 | 6420085  |
| 36 | 5-azido-4-(1,2-oxazol-3-yl)-3-[4-(1,2-oxazol-3-yl)-1,3-oxazol-2-yl]-1,2-oxazole                                                                  | C <sub>12</sub> H <sub>5</sub> N <sub>7</sub> O <sub>4</sub>                   | 311.04043 | 6.154 | 6411940  |
| 37 | 1,2-Benzenedicarboxylic acid/3a,4,5,7a-Tetrahydro-7-methyl-5-(tetrahydro-2,5-dioxofuran-3-yl)isobenzofuran-1,3-dione                             | C <sub>13</sub> H <sub>12</sub> O <sub>6</sub>                                 | 264.06342 | 6.108 | 6024058  |
| 38 | 4-hydroxy-7-[3-(4-methyl-2-nitrophenoxy)propoxy]-3-nitrochromen-2-one                                                                            | C <sub>19</sub> H <sub>16</sub> N <sub>2</sub> O <sub>9</sub>                  | 416.08561 | 2.839 | 5975077  |
| 39 | L-Arginine,N2-(5-oxo-L-prolyl)-; Pyroglutamyl-L-arginine                                                                                         | C <sub>11</sub> H <sub>19</sub> N <sub>5</sub> O <sub>4</sub>                  | 285.14361 | 1.463 | 5650426  |
| 40 | 5a,11a-Dehydroxytetracycline                                                                                                                     | C <sub>22</sub> H <sub>22</sub> N <sub>2</sub> O <sub>9</sub>                  | 458.13247 | 4.939 | 5562417  |
| 41 | 2-[7-(carboxymethyl)-4-[2-hydroxy-3-(2-phenylmethoxyethoxycarbonylamino)propyl]-10-(phosphonomethyl)-1,4,7,10-tetrazacyclododec-1-yl]acetic acid | C <sub>26</sub> H <sub>44</sub> N <sub>5</sub> O <sub>11</sub> P               | 633.27593 | 4.066 | 4898857  |
| 42 | NA                                                                                                                                               | C <sub>21</sub> H <sub>14</sub> N <sub>6</sub> O <sub>3</sub>                  | 398.11193 | 1.867 | 4732346  |
| 43 | L-Alanine/Glycine/Butanoic acid                                                                                                                  | C <sub>11</sub> H <sub>18</sub> N <sub>2</sub> O <sub>4</sub>                  | 242.1267  | 4.964 | 4585870  |
| 44 | Butabarbital                                                                                                                                     | C <sub>10</sub> H <sub>16</sub> N <sub>2</sub> O <sub>3</sub>                  | 212.1162  | 2.103 | 4334662  |
| 45 | Laguncurin                                                                                                                                       | C <sub>13</sub> H <sub>10</sub> O <sub>6</sub>                                 | 262.04785 | 7.089 | 4298820  |
| 46 | gamma-Glutamylleucine                                                                                                                            | C <sub>11</sub> H <sub>20</sub> N <sub>2</sub> O <sub>5</sub>                  | 260.13733 | 3.887 | 4084744  |
| 47 | 5-[[6-(3-nitrophenyl)-[1,2,4]triazolo[4,3-b]pyridazin-3-yl]methyl]-2H-isoquinolin-1-one                                                          | C <sub>19</sub> H <sub>11</sub> N <sub>5</sub> O <sub>4</sub>                  | 373.07988 | 2.794 | 3971158  |
| 48 | NA                                                                                                                                               | C <sub>19</sub> H <sub>20</sub> N <sub>4</sub> O <sub>6</sub>                  | 400.13852 | 2.201 | 3715474  |
| 49 | 2-Methyl-5-acetonyl-7-hydroxychromone                                                                                                            | C <sub>13</sub> H <sub>12</sub> O <sub>4</sub>                                 | 232.07358 | 6.042 | 3597246  |
| 50 | pantothenic acid                                                                                                                                 | C <sub>9</sub> H <sub>17</sub> NO <sub>5</sub>                                 | 219.1109  | 3.192 | 3590202  |

|    |                                                                                                                                                   |                                                                  |           |       |         |
|----|---------------------------------------------------------------------------------------------------------------------------------------------------|------------------------------------------------------------------|-----------|-------|---------|
| 51 | Benzoic acid/2H-1-Benzopyran-3-acetic acid                                                                                                        | C <sub>16</sub> H <sub>13</sub> NO <sub>7</sub>                  | 331.06925 | 2.262 | 3537893 |
| 52 | (2S)-3-(1H-Imidazol-4-yl)-2-({[(3S,4S,5R)-2,3,4-trihydroxy-5-(hydroxymethyl)tetrahydro-2-furanyl]methyl}amino)propanoic acid (non-preferred name) | C <sub>12</sub> H <sub>19</sub> N <sub>3</sub> O <sub>7</sub>    | 317.12234 | 1.215 | 3310321 |
| 53 | [Similar to: Rottlerin; ΔMass: 250.0993 Da]                                                                                                       |                                                                  | 266.07911 | 6.69  | 3289805 |
| 54 | DL-Proline                                                                                                                                        | C <sub>5</sub> H <sub>9</sub> NO <sub>2</sub>                    | 115.06342 | 2.884 | 3287841 |
| 55 | (2R,3S,4S,5S,6R)-2-(hydroxymethyl)-6-[4-[4-(2H-tetrazol-5-yl)phenyl]phenoxy]oxane-3,4,5-triol                                                     | C <sub>18</sub> H <sub>15</sub> NO <sub>9</sub>                  | 389.07473 | 2.867 | 3266584 |
| 56 | methyl 2,6-bis[(4,6-dimethoxypyrimidin-2-yl)oxy]benzoate                                                                                          | C <sub>20</sub> H <sub>20</sub> N <sub>4</sub> O <sub>8</sub>    | 444.12839 | 2.285 | 3238538 |
| 57 | propionylcarnitine                                                                                                                                | C <sub>10</sub> H <sub>19</sub> NO <sub>4</sub>                  | 217.13143 | 6.308 | 3222692 |
| 58 | Valyl-4-hydroxyproline                                                                                                                            | C <sub>10</sub> H <sub>18</sub> N <sub>2</sub> O <sub>4</sub>    | 230.1268  | 1.813 | 3187264 |
| 59 | Tetraacetylenediamine                                                                                                                             | C <sub>10</sub> H <sub>16</sub> N <sub>2</sub> O <sub>4</sub>    | 228.11119 | 3.706 | 3117527 |
| 60 | Laguncurin                                                                                                                                        | C <sub>13</sub> H <sub>10</sub> O <sub>6</sub>                   | 262.0478  | 6.19  | 3006762 |
| 61 | NA                                                                                                                                                | C <sub>20</sub> H <sub>41</sub> N <sub>4</sub> O <sub>11</sub> P | 544.24964 | 4.364 | 2877736 |
| 62 | (E)-4-Methoxycinnamic acid                                                                                                                        | C <sub>10</sub> H <sub>10</sub> O <sub>3</sub>                   | 178.06301 | 7.279 | 2871230 |
| 63 | Hydroxy-D-proline isomer                                                                                                                          | C <sub>5</sub> H <sub>9</sub> NO <sub>3</sub>                    | 131.05837 | 1.761 | 2839043 |
| 64 | Purpurin                                                                                                                                          | C <sub>14</sub> H <sub>8</sub> O <sub>5</sub>                    | 256.03694 | 7.274 | 2801205 |
| 65 | Ethyl 4-chlorobenzoylformate/3-Acetoxy-2-methylbenzoyl chloride                                                                                   | C <sub>10</sub> H <sub>9</sub> ClO <sub>3</sub>                  | 212.02399 | 7.262 | 2789234 |
| 66 | [Similar to: Methyl N-[5-(4-oxo-3,4-dihydrophthalazin-1-yl)-1H-benzo[d]imidazol-2-yl]carbamate; ΔMass: 0.0015 Da]                                 | C <sub>17</sub> H <sub>13</sub> N <sub>5</sub> O <sub>3</sub>    | 335.10029 | 5.984 | 2709883 |
| 67 | [similar to :Butanoic acid/Carbamic acid,2-propynyl-/Glycine/L-Alanine                                                                            | C <sub>11</sub> H <sub>18</sub> N <sub>2</sub> O <sub>4</sub>    | 242.1267  | 4.743 | 2595028 |
| 68 | 2-Phenylethyl octanoate                                                                                                                           | C <sub>16</sub> H <sub>24</sub> O <sub>2</sub>                   | 248.17753 | 7.281 | 2441243 |
| 69 | [(2S,3R,5S)-5-(4-amino-2-oxopyrimidin-1-yl)-2-(hydroxymethyl)oxolan-3-yl] (2S)-2-amino-3-methylbutanoate                                          | C <sub>14</sub> H <sub>22</sub> N <sub>4</sub> O <sub>5</sub>    | 326.15896 | 2.327 | 2345549 |
| 70 | [(2S,3R,5S)-5-(4-amino-2-oxopyrimidin-1-yl)-2-(hydroxymethyl)oxolan-3-yl] (2S)-2-amino-3-methylbutanoate                                          | C <sub>13</sub> H <sub>30</sub> N <sub>3</sub> O <sub>8</sub> P  | 387.17531 | 1.467 | 2204712 |
| 71 | 1,3-Benzenedimethanol                                                                                                                             | C <sub>14</sub> H <sub>15</sub> ClO <sub>6</sub>                 | 314.05571 | 5.801 | 2192994 |
| 72 | NA                                                                                                                                                | C <sub>12</sub> H <sub>18</sub> N <sub>4</sub> O <sub>2</sub>    | 250.14307 | 2.558 | 2098321 |
| 73 | 4-Hydroxypropylleucine                                                                                                                            | C <sub>11</sub> H <sub>20</sub> N <sub>2</sub> O <sub>4</sub>    | 244.14248 | 2.692 | 2084640 |

|     |                                                                       |                                                                                |            |       |         |
|-----|-----------------------------------------------------------------------|--------------------------------------------------------------------------------|------------|-------|---------|
| 74  | 3-Methyl-2-buten-1-yl (2E)-3-(3,4-dihydroxyphenyl)acrylate            | C <sub>14</sub> H <sub>16</sub> O <sub>4</sub>                                 | 248.10475  | 7.351 | 2074661 |
| 75  | N-(1-Hydroxycyclopropyl)glutamine                                     | C <sub>8</sub> H <sub>14</sub> N <sub>2</sub> O <sub>4</sub>                   | 202.09547  | 1.088 | 1962414 |
| 76  | 8-methyl-1,3-dipropyl-7H-purine-2,6-dione                             | C <sub>14</sub> H <sub>24</sub> N <sub>4</sub> O <sub>7</sub>                  | 360.16453  | 2.623 | 1802190 |
| 77  | N-(4-Heptanyl)-1,3-benzodioxole-5-carboxamide                         | C <sub>15</sub> H <sub>21</sub> NO <sub>3</sub>                                | 263.15217  | 6.885 | 1800054 |
| 78  | Oxagrelate                                                            | C <sub>14</sub> H <sub>16</sub> N <sub>2</sub> O <sub>4</sub>                  | 276.11109  | 5.275 | 1763495 |
| 79  | trimethadione                                                         | C <sub>6</sub> H <sub>9</sub> NO <sub>3</sub>                                  | 143.05837  | 6.308 | 1703829 |
| 80  | NA                                                                    | C <sub>26</sub> H <sub>31</sub> N <sub>4</sub> O <sub>2</sub> P <sub>3</sub>   | 524.16861  | 7.449 | 1700329 |
| 81  | NA                                                                    | C <sub>15</sub> H <sub>22</sub> N <sub>6</sub> O                               | 302.18558  | 7.648 | 1661645 |
| 82  | NA                                                                    | CH <sub>3</sub> N <sub>2</sub> O <sub>6</sub> P <sub>3</sub>                   | 231.92095  | 0.866 | 1623103 |
| 83  | Cytosine?                                                             | C <sub>4</sub> H <sub>5</sub> N <sub>3</sub> O                                 | 111.04334  | 2.085 | 1615302 |
| 84  | NA                                                                    | C <sub>56</sub> H <sub>80</sub> N <sub>10</sub> O <sub>16</sub> P <sub>2</sub> | 1608.74021 | 3.581 | 1597398 |
| 85  | D-Glucono-delta-lactone                                               | C <sub>6</sub> H <sub>10</sub> O <sub>6</sub>                                  | 178.04784  | 1.062 | 1556026 |
| 86  | NA                                                                    | C <sub>12</sub> H <sub>9</sub> ClN <sub>6</sub> O <sub>4</sub>                 | 336.03765  | 5.802 | 1545185 |
| 87  | DL-Stachydrine                                                        | C <sub>7</sub> H <sub>13</sub> NO <sub>2</sub>                                 | 143.09474  | 1.303 | 1531368 |
| 88  | NA                                                                    | C <sub>11</sub> H <sub>8</sub> N <sub>6</sub> O <sub>3</sub> S                 | 304.03819  | 5.561 | 1521821 |
| 89  | NA                                                                    | C <sub>13</sub> H <sub>19</sub> N <sub>9</sub> O <sub>3</sub>                  | 349.16143  | 5.173 | 1493127 |
| 90  | Benzeneaceticacid                                                     | C <sub>15</sub> H <sub>11</sub> NO <sub>6</sub>                                | 301.0588   | 4.634 | 1491449 |
| 91  | [simiar to 2'-O-Methyluridine                                         | C <sub>10</sub> H <sub>14</sub> N <sub>2</sub> O <sub>6</sub>                  | 258.08528  | 2.079 | 1487783 |
| 92  | NA                                                                    | C <sub>16</sub> H <sub>26</sub> N <sub>6</sub>                                 | 302.22209  | 8.105 | 1433292 |
| 93  | NA                                                                    | C <sub>8</sub> H <sub>16</sub> N <sub>2</sub> O <sub>2</sub>                   | 172.12146  | 2.956 | 1406436 |
| 94  | NA                                                                    | C <sub>24</sub> H <sub>45</sub> N <sub>3</sub> O <sub>15</sub>                 | 615.28659  | 4.067 | 1390608 |
| 95  | NA                                                                    | C <sub>8</sub> H <sub>15</sub> N <sub>7</sub> O <sub>3</sub>                   | 257.12389  | 1.378 | 1360745 |
| 96  | NA                                                                    | C <sub>30</sub> H <sub>39</sub> N <sub>7</sub> O <sub>5</sub> P <sub>2</sub> S | 671.22247  | 4.071 | 1300815 |
| 97  | Citrinin?                                                             | C <sub>13</sub> H <sub>14</sub> O <sub>5</sub>                                 | 250.08409  | 6.234 | 1284442 |
| 98  | N-(tert-Butoxycarbonyl)-L-leucine                                     | C <sub>11</sub> H <sub>21</sub> NO <sub>4</sub>                                | 231.1472   | 3.003 | 1268033 |
| 99  | NA                                                                    | C <sub>4</sub> H <sub>6</sub> N <sub>6</sub> O <sub>5</sub>                    | 218.04031  | 1.065 | 1263770 |
| 100 | NA                                                                    | C <sub>16</sub> H <sub>24</sub> N <sub>6</sub> O <sub>4</sub>                  | 364.18594  | 7.393 | 1248896 |
| 101 | NA                                                                    | C <sub>56</sub> H <sub>80</sub> N <sub>10</sub> O <sub>16</sub> P <sub>2</sub> | 1210.5224  | 2.695 | 1247446 |
| 102 | NA                                                                    | C <sub>12</sub> H <sub>9</sub> ClN <sub>6</sub> O <sub>3</sub>                 | 320.04264  | 7.085 | 1229503 |
| 103 | NA                                                                    | C <sub>9</sub> H <sub>7</sub> N <sub>7</sub> O                                 | 229.07153  | 5.454 | 1136685 |
| 104 | (2Z)-3-(3,4,5-Trimethoxyphenyl)-2-propen-1-yl acetate                 | C <sub>14</sub> H <sub>18</sub> O <sub>5</sub>                                 | 266.11529  | 7.232 | 1094125 |
| 105 | tolcapone?                                                            | C <sub>14</sub> H <sub>11</sub> NO <sub>5</sub>                                | 273.06369  | 5.702 | 1053435 |
| 106 | [Similar to: N1,N5-Bis(3-pyridinyl)pentanediamide; ΔMass: -0.0001 Da] | C <sub>15</sub> H <sub>16</sub> N <sub>4</sub> O <sub>2</sub>                  | 284.1274   | 3.356 | 1034386 |
| 107 | YWA1                                                                  | C <sub>14</sub> H <sub>12</sub> O <sub>6</sub>                                 | 276.06335  | 5.249 | 1034155 |
| 108 | NA                                                                    | C <sub>55</sub> H <sub>72</sub> N <sub>3</sub> O <sub>15</sub> P               | 1045.46982 | 5.327 | 1026571 |
| 109 | Oxolinic acid                                                         | C <sub>13</sub> H <sub>11</sub> NO <sub>5</sub>                                | 261.06385  | 2.78  | 1025209 |
| 110 | 4-Amino-3-hydroxybenzoic acid                                         | C <sub>7</sub> H <sub>7</sub> NO <sub>3</sub>                                  | 153.04278  | 2.945 | 1002378 |

|     |                                                                                                               |                                                                                 |           |       |          |
|-----|---------------------------------------------------------------------------------------------------------------|---------------------------------------------------------------------------------|-----------|-------|----------|
| 111 | 1-Hydroxy-1-[(6R)-4-hydroxy-2-imino-1,2,5,6,7,8-hexahydro-6-pteridiny]-2-propanyl beta-D-glucopyranoside      | C <sub>15</sub> H <sub>25</sub> N <sub>5</sub> O <sub>8</sub>                   | 403.17038 | 1.185 | 993739.4 |
| 112 | NA                                                                                                            | C <sub>23</sub> H <sub>27</sub> N <sub>9</sub> O <sub>4</sub>                   | 493.21765 | 3.792 | 993300.4 |
| 113 | 4,4-Dimethyl-5-(methylcarbamoyloxyimino)valeronitrile                                                         | C <sub>9</sub> H <sub>15</sub> N <sub>3</sub> O <sub>2</sub>                    | 197.11649 | 1.019 | 990684.1 |
| 114 | 1-[N-(g-L-Glutamyl)amino]-D-proline                                                                           | C <sub>10</sub> H <sub>17</sub> N <sub>3</sub> O <sub>5</sub>                   | 259.11688 | 1.283 | 984747.3 |
| 115 | Benserazide                                                                                                   | C <sub>10</sub> H <sub>15</sub> N <sub>3</sub> O <sub>5</sub>                   | 257.10126 | 1.587 | 967057.5 |
| 116 | Benzo[b]thiophene-2-carboxylicacid, 5,6-diethoxy-;5,6-Diethoxybenzo[b]thiophene-2-carboxylicacid              | C <sub>13</sub> H <sub>14</sub> O <sub>4</sub> S                                | 266.06115 | 7.295 | 966580.3 |
| 117 | NA                                                                                                            | C <sub>34</sub> H <sub>71</sub> N <sub>5</sub> O <sub>17</sub> P <sub>2</sub> S | 915.40475 | 2.12  | 925686.1 |
| 118 | NA                                                                                                            | C <sub>35</sub> H <sub>71</sub> N <sub>2</sub> O <sub>13</sub> P <sub>3</sub> S | 852.38987 | 3.932 | 904742.3 |
| 119 | dinotefuran                                                                                                   | C <sub>7</sub> H <sub>14</sub> N <sub>4</sub> O <sub>3</sub>                    | 202.10677 | 1.191 | 903018.9 |
| 120 | (1R)-1,5-Anhydro-6-deoxy-1-(1-hydroxy-10,12-dimethoxy-6-oxo-8-vinyl-6H-dibenzo[c,h]chromen-4-yl)-D-galactitol |                                                                                 | 494.15769 | 7.519 | 882781.7 |
| 121 | UNII:Z5JO63XGNK                                                                                               | C <sub>17</sub> H <sub>26</sub> O <sub>2</sub>                                  | 262.19309 | 7.626 | 862319.6 |
| 122 | (+)-Riboflavin                                                                                                | C <sub>17</sub> H <sub>20</sub> N <sub>4</sub> O <sub>6</sub>                   | 376.13814 | 4.939 | 822614.4 |
| 123 | 2-Pyrrolidone                                                                                                 | C <sub>4</sub> H <sub>7</sub> NO                                                | 85.0528   | 1.048 | 814093.5 |
| 124 | [similar to 1H-Benzimidazole-2-acetonitrile]                                                                  | C <sub>14</sub> H <sub>8</sub> N <sub>4</sub> O <sub>3</sub>                    | 280.05831 | 6.781 | 805500.1 |
| 125 | NA                                                                                                            | C <sub>26</sub> H <sub>33</sub> N <sub>8</sub> O <sub>2</sub> P <sub>3</sub>    | 582.19628 | 4.364 | 805044.3 |
| 126 | Thymine?                                                                                                      | C <sub>5</sub> H <sub>6</sub> N <sub>2</sub> O <sub>2</sub>                     | 126.04301 | 2.269 | 801481.7 |
| 127 | NA                                                                                                            | C <sub>21</sub> H <sub>16</sub> N <sub>6</sub> O <sub>3</sub>                   | 400.12715 | 2.147 | 794418.7 |
| 128 | NA                                                                                                            | C <sub>11</sub> H <sub>15</sub> N <sub>9</sub> O <sub>3</sub>                   | 321.13014 | 4.844 | 788852.8 |
| 129 | NA                                                                                                            | C <sub>27</sub> H <sub>51</sub> N <sub>6</sub> O <sub>14</sub> P                | 714.31843 | 4.055 | 781780.7 |
| 130 | 1-[(2-hydroxyethyl)amino]cyclobutene-1-carbonitrile                                                           | C <sub>8</sub> H <sub>9</sub> N                                                 | 119.07365 | 5.454 | 780792.4 |
| 131 | 6-Hydroxy-8-methoxy-3-methyl-3,4-dihydro-1H-isochromen-1-one                                                  | C <sub>11</sub> H <sub>12</sub> O <sub>4</sub>                                  | 208.07367 | 5.671 | 779119.1 |
| 132 | NA                                                                                                            | C <sub>22</sub> H <sub>25</sub> N <sub>10</sub> O <sub>9</sub> P                | 604.1555  | 6.416 | 763159.8 |
| 133 | NA                                                                                                            | C <sub>8</sub> H <sub>17</sub> O <sub>8</sub> P                                 | 272.06606 | 6.233 | 758759.5 |
| 134 | NA                                                                                                            | C <sub>14</sub> H <sub>11</sub> ClN <sub>6</sub> O <sub>4</sub>                 | 362.05331 | 7.015 | 747512.4 |
| 135 | Argininosuccinic acid                                                                                         | C <sub>10</sub> H <sub>18</sub> N <sub>4</sub> O <sub>6</sub>                   | 290.12259 | 1.021 | 744688.8 |
| 136 | N, N-Dimethyladenosine                                                                                        | C <sub>12</sub> H <sub>17</sub> N <sub>5</sub> O <sub>4</sub>                   | 295.12813 | 3.838 | 724680.1 |
| 137 | capuride                                                                                                      | C <sub>9</sub> H <sub>18</sub> N <sub>2</sub> O <sub>2</sub>                    | 186.13709 | 3.604 | 713597.7 |
| 138 | Aspartyl-L-proline                                                                                            | C <sub>9</sub> H <sub>14</sub> N <sub>2</sub> O <sub>5</sub>                    | 230.0904  | 2.101 | 702758.2 |
| 139 | NA                                                                                                            | C <sub>13</sub> H <sub>15</sub> O <sub>2</sub> P <sub>3</sub>                   | 296.02955 | 7.275 | 699556   |
| 140 | Paramethadione                                                                                                | C <sub>7</sub> H <sub>11</sub> NO <sub>3</sub>                                  | 157.0741  | 2.386 | 698043.2 |

|     |                                                                                    |                                                                                |           |       |          |
|-----|------------------------------------------------------------------------------------|--------------------------------------------------------------------------------|-----------|-------|----------|
| 141 | NA                                                                                 | C <sub>13</sub> H <sub>20</sub> N <sub>8</sub> O <sub>6</sub> S                | 416.12229 | 1.543 | 690981.4 |
| 142 | Benserazide                                                                        | C <sub>10</sub> H <sub>15</sub> N <sub>3</sub> O <sub>5</sub>                  | 257.10135 | 2.085 | 688806.1 |
| 143 | Triazine-3,5(C175,C181)-dione,2-(2-deoxy-b-D-arabino-hexopyranosyl)-6-methyl-(8Cl) | C <sub>10</sub> H <sub>15</sub> N <sub>3</sub> O <sub>6</sub>                  | 273.09607 | 1.506 | 688461.9 |
| 144 | epsilon-(gamma-Glutamyl)-lysine                                                    | C <sub>11</sub> H <sub>21</sub> N <sub>3</sub> O <sub>5</sub>                  | 275.14832 | 3.301 | 654256.5 |
| 145 | NA                                                                                 | C <sub>12</sub> H <sub>17</sub> N <sub>9</sub> O <sub>3</sub>                  | 335.1456  | 4.279 | 640720   |
| 146 | n-Ribosylhistidine                                                                 | C <sub>11</sub> H <sub>17</sub> N <sub>3</sub> O <sub>6</sub>                  | 287.11169 | 1.149 | 635073.5 |
| 147 | 9H-Purin-6-amine                                                                   | C <sub>10</sub> H <sub>11</sub> N <sub>5</sub> O <sub>3</sub>                  | 249.08621 | 2.891 | 618739   |
| 148 | NA                                                                                 | C <sub>11</sub> H <sub>10</sub> N <sub>8</sub> O <sub>2</sub>                  | 286.093   | 5.014 | 617247.8 |
| 149 | NA                                                                                 | C <sub>12</sub> H <sub>8</sub> N <sub>6</sub> O <sub>4</sub>                   | 300.06108 | 5.683 | 609763   |
| 150 | 3-(5-Fluoro-2-hydroxy-4-oxo-3,4-dihydro-1(2H)-pyrimidinyl)-L-alanine               | C <sub>7</sub> H <sub>10</sub> FN <sub>3</sub> O <sub>4</sub>                  | 219.06585 | 5.561 | 595129.5 |
| 151 | 1-Pentofuranosyl-2,4(1H,3H)-pyrimidinedione                                        | C <sub>9</sub> H <sub>12</sub> N <sub>2</sub> O <sub>6</sub>                   | 244.06964 | 1.607 | 594542.6 |
| 152 | NA                                                                                 | C <sub>19</sub> H <sub>27</sub> N <sub>7</sub> O <sub>3</sub>                  | 401.21758 | 7.624 | 592980.4 |
| 153 | Dyphylline                                                                         | C <sub>10</sub> H <sub>14</sub> N <sub>4</sub> O <sub>4</sub>                  | 254.10156 | 1.217 | 586828.9 |
| 154 | NA                                                                                 | C <sub>12</sub> H <sub>24</sub> N <sub>2</sub> P <sub>2</sub>                  | 258.14092 | 1.23  | 573900.6 |
| 155 | NA                                                                                 | C <sub>10</sub> H <sub>11</sub> N <sub>4</sub> O <sub>3</sub> P                | 298.04549 | 5.248 | 566875.6 |
| 156 | NA                                                                                 | C <sub>14</sub> H <sub>20</sub> N <sub>6</sub> O                               | 288.17    | 7.579 | 529502.3 |
| 157 | NA                                                                                 | C <sub>17</sub> H <sub>26</sub> N <sub>2</sub> O <sub>2</sub> S <sub>2</sub>   | 354.14412 | 7.445 | 519300.9 |
| 158 | NA                                                                                 | C <sub>15</sub> H <sub>27</sub> N <sub>5</sub> O <sub>9</sub> P <sub>2</sub>   | 483.12802 | 1.424 | 509096.2 |
| 159 | a-D-Glucopyranoside                                                                | C <sub>7</sub> H <sub>15</sub> NO <sub>5</sub>                                 | 193.0953  | 1.133 | 480503.1 |
| 160 | NA                                                                                 | C <sub>4</sub> H <sub>6</sub> N <sub>7</sub> O <sub>2</sub> P                  | 215.03183 | 1.071 | 471430.3 |
| 161 | NA                                                                                 | C <sub>13</sub> H <sub>25</sub> N <sub>2</sub> O <sub>6</sub> P <sub>3</sub> S | 430.06379 | 1.072 | 467191.4 |
| 162 | 6-Methoxy-2-oxo-2H-chromen-7-yl acetate                                            | C <sub>12</sub> H <sub>10</sub> O <sub>5</sub>                                 | 234.05295 | 5.341 | 441297.5 |
| 163 | 2-Pyrimidinamine                                                                   | C <sub>10</sub> H <sub>10</sub> N <sub>6</sub> O <sub>2</sub>                  | 246.08688 | 7.112 | 435236   |
| 164 | NA                                                                                 | C <sub>29</sub> H <sub>43</sub> N <sub>3</sub> O <sub>8</sub> P <sub>2</sub> S | 655.22379 | 2.496 | 431165   |
| 165 | 2-cyclohexyl-N-(piperidin-4-yl) acetamide hydrochloride                            | C <sub>16</sub> H <sub>11</sub> NO <sub>7</sub>                                | 329.05358 | 2.411 | 416763.1 |
| 166 | NA                                                                                 | C <sub>5</sub> H <sub>6</sub> N <sub>8</sub> O <sub>2</sub>                    | 210.0617  | 1.405 | 413744.1 |
| 167 | 2-2'-sulfonyldiethanol                                                             | C <sub>5</sub> H <sub>5</sub> N <sub>7</sub> O <sub>2</sub>                    | 195.05097 | 2.163 | 407806.3 |
| 168 | NA                                                                                 | C <sub>30</sub> H <sub>34</sub> S                                              | 426.23817 | 7.476 | 380587.3 |
| 169 | NA                                                                                 | C <sub>15</sub> H <sub>21</sub> N <sub>4</sub> O <sub>4</sub> P                | 352.12856 | 7.358 | 342381.6 |

**22 ESI (+) Components in PDB media identified based on based on P-value < 0.005 and Fold change >2**

|   |                                                                                                                                  |                                                               |           |       |          |
|---|----------------------------------------------------------------------------------------------------------------------------------|---------------------------------------------------------------|-----------|-------|----------|
| 1 | D-Fructose,1-[[1-carboxy-2-(1H-indol-3-yl)ethyl]amino]-1-deoxy-                                                                  | C <sub>17</sub> H <sub>22</sub> N <sub>2</sub> O <sub>7</sub> | 366.14256 | 3.445 | 32663739 |
| 2 | 1-[[[(3S,4S,5R)-2,3,4-Trihydroxy-5-(hydroxymethyl)tetrahydro-2-furanyl]methyl]-2-pyrrolidinecarboxylic acid (non-preferred name) | C <sub>11</sub> H <sub>19</sub> NO <sub>7</sub>               | 277.11617 | 1.252 | 26335099 |
| 3 | (2S)-3-Methyl-2-[[[(3S,4S,5R)-2,3,4-trihydroxy-5-(hydroxymethyl)tetrahydro-2-                                                    | C <sub>11</sub> H <sub>21</sub> NO <sub>7</sub>               | 279.13172 | 1.206 | 15815560 |



|    |                                                                                                             |                                                                 |           |       |          |
|----|-------------------------------------------------------------------------------------------------------------|-----------------------------------------------------------------|-----------|-------|----------|
|    | furanyl]methyl}amino)butanoic acid<br>(non-preferred name)                                                  |                                                                 |           |       |          |
| 4  | Pyridoxine                                                                                                  | C <sub>8</sub> H <sub>11</sub> NO <sub>3</sub>                  | 169.07401 | 1.622 | 12056005 |
| 5  | 3,5-Dimethyl-1h-Pyrrole-2,4-Dicarboxylic Acid                                                               | C <sub>8</sub> H <sub>9</sub> NO <sub>4</sub>                   | 183.05329 | 1.184 | 9504445  |
| 6  | 3-(4-Amino-2-methylpyrimidyl-5-methyl)-4-methyl-5,betahydroxyethylthiazolium nitrate                        | C <sub>12</sub> H <sub>17</sub> N <sub>5</sub> O <sub>4</sub> S | 327.09869 | 1.109 | 8207362  |
| 7  | 4-Amino-3-[(1-carboxyvinyl)oxy]-1,5-cyclohexadiene-1-carboxylic acid                                        | C <sub>10</sub> H <sub>11</sub> NO <sub>5</sub>                 | 225.06373 | 1.699 | 8065979  |
| 8  | Phthalazino[2,3-b]phthalazine-5,12(7H,14H)-dione                                                            | C <sub>16</sub> H <sub>12</sub> N <sub>2</sub> O <sub>2</sub>   | 264.08981 | 5.956 | 6747292  |
| 9  | 4-Nitroacetophenone                                                                                         | C <sub>8</sub> H <sub>7</sub> NO <sub>3</sub>                   | 165.04277 | 3.091 | 6224828  |
| 10 | (5R,6R)-3,3-dimethyl-7-oxo-6-(2-phenylethanoylamino)-4-thia-1-azabicyclo[3.2.0]heptane-2-carboxylic acid    | C <sub>16</sub> H <sub>18</sub> N <sub>2</sub> O <sub>4</sub>   | 302.12667 | 4.166 | 2559272  |
| 11 | (2S,5R,6R)-3,3-dimethyl-7-oxo-6-(2-phenylethanoylamino)-4-thia-1-azabicyclo[3.2.0]heptane-2-carboxylic acid | C <sub>16</sub> H <sub>18</sub> N <sub>2</sub> O <sub>4</sub>   | 302.12663 | 4.19  | 2452074  |
| 12 | 1-Pyrrolidineaceticacid/1H-Imidazole                                                                        | C <sub>12</sub> H <sub>18</sub> N <sub>4</sub> O <sub>4</sub>   | 282.13282 | 2.096 | 2369748  |
| 13 | Phenacetin?                                                                                                 | C <sub>10</sub> H <sub>13</sub> NO <sub>2</sub>                 | 179.09471 | 5.284 | 1841262  |
| 14 | [ siimilar to 1-(oxiranylmethyl)-3,5-di-2-propenyl-1,3,5-Triazine-2,4,6(1H,3H,5H)-trione                    | C <sub>12</sub> H <sub>15</sub> N <sub>3</sub> O <sub>4</sub>   | 265.10614 | 3.441 | 1833240  |
| 15 | [similar to L-Aspartic acid 4-tert-butyl este                                                               | C <sub>8</sub> H <sub>15</sub> NO <sub>4</sub>                  | 189.10025 | 2.4   | 1627202  |
| 16 |                                                                                                             | C <sub>9</sub> H <sub>21</sub> NO <sub>10</sub> P <sub>2</sub>  | 365.06391 | 1.744 | 1363189  |
| 17 | N-hydroxy-2-(6-oxo-4-phenyl-1,6-dihydropyrimidin-2-yl) acetamide                                            | C <sub>12</sub> H <sub>11</sub> N <sub>3</sub> O <sub>3</sub>   | 245.08022 | 1.908 | 1126442  |
| 18 | NA                                                                                                          | C <sub>13</sub> H <sub>24</sub> N <sub>2</sub> O <sub>8</sub>   | 336.15315 | 1.162 | 1096218  |
| 19 | NA                                                                                                          | C <sub>23</sub> H <sub>16</sub> N <sub>6</sub> O                | 392.13713 | 5.499 | 1074948  |
| 20 | NA                                                                                                          | C <sub>13</sub> H <sub>7</sub> N <sub>7</sub> O                 | 277.0714  | 7.29  | 700959.2 |
| 21 | [similar to Alanine,N-[(4-methylphenyl)sulfonyl]-                                                           | C <sub>10</sub> H <sub>13</sub> NO <sub>4</sub> S               | 243.05656 | 1.11  | 657213   |
| 22 | Phenol,2-(4-nitrophenoxy)                                                                                   | C <sub>12</sub> H <sub>9</sub> NO <sub>4</sub>                  | 231.05338 | 2.177 | 551381.9 |

**Table S2. Potentially relevant oxidases responsible for the formation of oxidants (hydrogen**

| Metabolites                                   | Formula                                                     | Structure                                                                           | Pathway                                                                                                                          | Enzyme name                                                                     |
|-----------------------------------------------|-------------------------------------------------------------|-------------------------------------------------------------------------------------|----------------------------------------------------------------------------------------------------------------------------------|---------------------------------------------------------------------------------|
| D-Glucono-1,5-lactone                         | C <sub>6</sub> H <sub>10</sub> O <sub>6</sub>               | 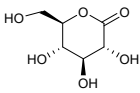   | -Pentose phosphate pathway;<br>-Metabolic pathways;<br>-Microbial metabolism in diverse environments;<br>-Tryptophan metabolism; | Glucose oxyhydrase (EC 1.3.3.4);<br>hexose oxidase (EC 1.3.3.5)                 |
| 4-Amino-3-hydroxybenzoic acid                 | C <sub>7</sub> H <sub>7</sub> N O <sub>3</sub>              |    | -Aminobenzoate degradation;<br>-Metabolic pathways;<br>-Microbial metabolism in diverse environments;                            | 3-Hydroxyanthranilate oxidase EC (1.10.3.5)                                     |
| Pyridoxine                                    | C <sub>8</sub> H <sub>11</sub> N O <sub>3</sub>             |    | -Vitamin B6 metabolism<br>-Metabolic pathways<br>-Microbial metabolism in diverse environments                                   | Pyridoxine 4-oxidase(EC1.1.3.12)<br>pyridoxamine phosphate oxidase (EC 1.4.3.5) |
| Hydrouracil                                   | C <sub>4</sub> H <sub>6</sub> N <sub>2</sub> O <sub>2</sub> |    | -Pyrimidine metabolism;<br>-beta-Alanine metabolism;<br>-Pantothenate and CoA biosynthesis;                                      | dihydrouracil oxidase (EC 1.3.3.7)                                              |
| Uracil                                        | C <sub>4</sub> H <sub>4</sub> N <sub>2</sub> O <sub>2</sub> |  | -Metabolic pathways;<br>-Pyrimidine metabolism;<br>-beta-Alanine metabolism;<br>-Pantothenate and CoA biosynthesis;              | dihydrouracil oxidase (EC 1.3.3.7)                                              |
| <b>peroxide (H<sub>2</sub>O<sub>2</sub>))</b> |                                                             |                                                                                     |                                                                                                                                  |                                                                                 |

**Table S3a. Top 25 of total 169 ESI (+) compounds in MYGP culture media (ranking based on FC (fold change) number)**

| Ranking | Name                                                | Formula                                         | Structure                                                                             | FC (Fold change) number | KEGG Pathways |
|---------|-----------------------------------------------------|-------------------------------------------------|---------------------------------------------------------------------------------------|-------------------------|---------------|
| 1       | 2,2'-Iminobis (4-hydroxybenzoic acid)               | C <sub>14</sub> H <sub>11</sub> NO <sub>6</sub> | 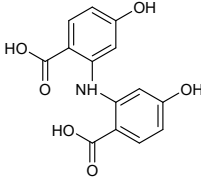   | 14.1301                 | NA            |
| 2       | Purpurin                                            | C <sub>14</sub> H <sub>8</sub> O <sub>5</sub>   |    | 11.9657                 | NA            |
| 3       | 1-(4-Acetoxy-3-methoxyphenyl)-2-propen-1-yl acetate | C <sub>14</sub> H <sub>16</sub> O <sub>5</sub>  |   | 11.3561                 | NA            |
| 4       | N-(4-Heptanyl)-1,3-benzodioxole-5-carboxamide       | C <sub>15</sub> H <sub>21</sub> NO <sub>3</sub> |  | 10.5023                 | NA            |

|   |                                                                                     |                      |                                                                                       |        |                                                                                                                                             |
|---|-------------------------------------------------------------------------------------|----------------------|---------------------------------------------------------------------------------------|--------|---------------------------------------------------------------------------------------------------------------------------------------------|
| 5 | [Methyl N-[5-(4-oxo-3,4-dihydrophthalazin-1-yl)-1H-benzo[d]imidazol-2-yl]carbamate; | $C_{17}H_{13}N_5O_3$ | 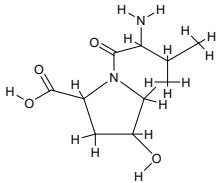   | 10.381 | NA                                                                                                                                          |
| 6 | Propionylcarnitine                                                                  | $C_{10}H_{19}NO_4$   |    | 9.9233 | NA                                                                                                                                          |
| 7 | (E)-4-Methoxycinnamic acid                                                          | $C_{10}H_{10}O_3$    |    | 9.9191 | Metabolic pathways;<br>Biosynthesis of secondary metabolites; 2-Oxocarboxylic acid metabolism; Other                                        |
| 8 | 4-Hydroxy-6-methyl-2-pyrone<br>or Hydroxyhydroquinone                               | $C_6H_6O_3$          |    | 9.5079 | Metabolic pathways;<br>Microbial metabolism in diverse environments;<br>Biosynthesis of antibiotics;<br>Aminobenzoate degradation;<br>Other |
| 9 | Rottlerin                                                                           | $C_{30}H_{28}O_8$    |  | 9.4200 | Other                                                                                                                                       |

|    |                                                                                           |                    |                                                                                       |        |                                                                                                                                                         |
|----|-------------------------------------------------------------------------------------------|--------------------|---------------------------------------------------------------------------------------|--------|---------------------------------------------------------------------------------------------------------------------------------------------------------|
| 10 | capuride                                                                                  | $C_9H_{18}N_2O_2$  | 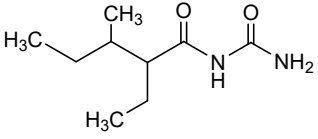    | 9.3584 | Metabolic pathways;<br>Microbial metabolism in diverse environments;<br>Biosynthesis of secondary metabolites;                                          |
| 11 | Oxolinic acid                                                                             | $C_{13}H_{11}NO_5$ |    | 9.3053 | other                                                                                                                                                   |
| 12 | Laguncurin                                                                                | $C_{13}H_{10}O_6$  |    | 9.2462 | Metabolic pathways;<br>Microbial metabolism in diverse environments; Other                                                                              |
| 13 | 6-Hydroxy-8-methoxy-3-methyl-3,4-dihydro-1H-isochromen-1-one                              | $C_{11}H_{12}O_4$  |    | 9.2035 | Metabolic pathways;<br>Microbial metabolism in diverse environments;<br>Biosynthesis of secondary metabolites; Degradation of aromatic compounds; Other |
| 14 | tolcapone?                                                                                | $C_{14}H_{11}NO_5$ |  | 8.9990 | Metabolic pathways;<br>Microbial metabolism in diverse environments;<br>Biosynthesis of secondary metabolites;                                          |
| 15 | (2Z)-3-[4,5-Dihydroxy-2-(2-hydroxy-2-propanyl)-2,3-dihydro-1-benzofuran-7-yl]acrylic acid | $C_{14}H_{16}O_6$  |  | 8.9382 | Other                                                                                                                                                   |

|    |                                                             |                      |                                                                                       |         |                                                                                |
|----|-------------------------------------------------------------|----------------------|---------------------------------------------------------------------------------------|---------|--------------------------------------------------------------------------------|
| 16 | ophthalmic acid                                             | $C_{11}H_{19}N_3O_6$ | 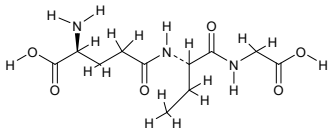    | 8.9119  | Metabolic pathways; Other                                                      |
| 17 | 4-Amino-3-hydroxybenzoic acid                               | $C_7H_7NO_3$         |    | 8.8332  | Microbial metabolism in diverse environments<br>/Aminobenzoate degradation     |
| 18 | (2Z)-3-(3,4,5-Trimethoxyphenyl)-2-propen-1-yl acetate       | $C_{14}H_{18}O_5$    |    | 8.8094  | other                                                                          |
| 19 | Uracil?                                                     | $C_4H_4N_2O_2$       |    | 8.16210 | Metabolic pathways/<br>Pyrimidine metabolism; Other                            |
| 20 | 5a,11a-Dehydroxytetracycline                                | $C_{22}H_{22}N_2O_9$ |   | 8.0433  | Tetracycline biosynthesis or<br>Biosynthesis of type II<br>polyketide products |
| 21 | N-(tert-Butoxycarbonyl)-L-leucine                           | $C_{11}H_{21}NO_4$   |  | 7.96167 | Metabolic<br>pathways/Biosynthesis of<br>secondary metabolites;                |
| 22 | 3-Methyl-2-buten-1-yl (2E)-3-(3,4-dihydroxyphenyl) acrylate | $C_{14}H_{16}O_4$    |  | 7.5830  | Biosynthesis of antibiotics;<br>Other                                          |

|    |                     |                      |                                                                                     |        |                                                                                                                      |
|----|---------------------|----------------------|-------------------------------------------------------------------------------------|--------|----------------------------------------------------------------------------------------------------------------------|
| 23 | Aceglutamide        | $C_7H_{12}N_2O_4$    | 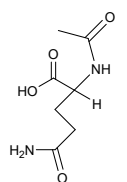 | 7.4598 | Biosynthesis of antibiotics;<br>Other                                                                                |
| 24 | N-Methylpyrrolidone | $C_5H_9NO$           |  | 7.3895 | Biosynthesis of antibiotics;<br>Other                                                                                |
| 25 | Benserazide         | $C_{10}H_{15}N_3O_5$ |  | 6.941  | Metabolic pathways;<br>Microbial metabolism in<br>diverse environments;<br>Biosynthesis of secondary<br>metabolites; |

---

**Table S3b. TOP 25 of total 88 ESI (-) compounds in MYGP media (ranking based on FC number)**

| Ranking | Name                                                | Formula                                         | Structure                                                                             | FC (Fold change) number | KEGG Pathways                                                                                  |
|---------|-----------------------------------------------------|-------------------------------------------------|---------------------------------------------------------------------------------------|-------------------------|------------------------------------------------------------------------------------------------|
| 1       | 2,2'-Iminobis (4-hydroxybenzoic acid)               | C <sub>14</sub> H <sub>11</sub> NO <sub>6</sub> | 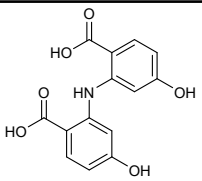   | 15.1975                 | NA                                                                                             |
| 2       | YWA1                                                | C <sub>14</sub> H <sub>12</sub> O <sub>6</sub>  |    | 11.5885                 | NA                                                                                             |
| 3       | 1-(4-Acetoxy-3-methoxyphenyl)-2-propen-1-yl acetate | C <sub>14</sub> H <sub>16</sub> O <sub>5</sub>  |    | 11.5607                 | Metabolic pathways/<br>Biosynthesis of secondary metabolites                                   |
| 4       | Digallic acid                                       | C <sub>14</sub> H <sub>10</sub> O <sub>9</sub>  |   | 11.3164                 | NA                                                                                             |
| 5       | 3-Allyl-2-hydroxybenzoic acid                       | C <sub>10</sub> H <sub>10</sub> O <sub>3</sub>  |  | 10.6746                 | Metabolic pathways;<br>Biosynthesis of secondary metabolites; 2-Oxocarboxylic acid metabolism; |



|    |                                                                                                              |                   |                                                                                       |         |                                                                      |
|----|--------------------------------------------------------------------------------------------------------------|-------------------|---------------------------------------------------------------------------------------|---------|----------------------------------------------------------------------|
| 6  | leucodelphinidin                                                                                             | $C_{15}H_{14}O_8$ | 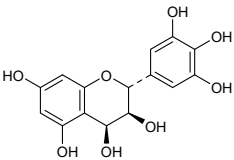   | 10.5084 | Biosynthesis of secondary metabolites;                               |
| 7  | 6-Methoxy-2-oxo-2H-chromen-7-yl acetate                                                                      | $C_{12}H_{10}O_5$ |    | 10.3994 | Metabolic pathways;<br>Microbial metabolism in diverse environments; |
| 8  | (3S,4R)-3,4,5-Trihydroxy-4'-oxo-3',4,4',5-tetrahydro-2'H,3H-spiro[furan-2,1'-naphthalene]-6'-carboxylic acid | $C_{14}H_{14}O_7$ |    | 10.3631 | Biosynthesis of secondary metabolites;                               |
| 9  | UNII: PP1L5D6A0Y                                                                                             | $C_{12}H_{16}O_4$ |    | 10.0496 | Other                                                                |
| 10 | Methyl alpha-D-mannopyranoside                                                                               | $C_7H_{14}O_6$    |   | 9.8825  | ABC transporters/Other                                               |
| 11 | 1-Allyl-2,3,4,5-tetramethoxybenzene                                                                          | $C_{13}H_{18}O_4$ |  | 9.6714  | Metabolic pathways;<br>Microbial metabolism in diverse environments; |
| 12 | N-Acetyl-DL-norvaline?                                                                                       | $C_7H_{13}NO_3$   |  | 9.6049  | Other                                                                |

|    |                                                                                                               |                      |                                                                                       |        |                                                                      |
|----|---------------------------------------------------------------------------------------------------------------|----------------------|---------------------------------------------------------------------------------------|--------|----------------------------------------------------------------------|
| 13 | 1,1'-(2,4,6-Trihydroxy-1,3-phenylene) diethanone                                                              | $C_{10}H_{10}O_5$    | 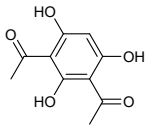   | 9.2201 | Metabolic pathways;<br>Biosynthesis of secondary metabolites;        |
| 14 | ophthalmic acid                                                                                               | $C_{11}H_{19}N_3O_6$ |     | 9.1146 | Metabolic pathways; Other                                            |
| 15 | 4-Hydroxy-6-methyl-2-pyrone                                                                                   | $C_6H_6O_3$          |    | 9.1075 | Metabolic pathways;<br>Microbial metabolism in diverse environments; |
| 16 | (1R)-1,5-Anhydro-6-deoxy-1-(1-hydroxy-10,12-dimethoxy-6-oxo-8-vinyl-6H-dibenzo[c,h]chromen-4-yl)-D-galactitol | $C_{27}H_{26}O_9$    |    | 8.9693 | Metabolic pathways;<br>Microbial metabolism in diverse environments; |
| 17 | 4-hydroxy-4-(indol-3-ylmethyl)glutamic acid                                                                   | $C_{14}H_{16}N_2O_5$ |   | 8.428  | Biosynthesis of antibiotics;                                         |
| 18 | Diosmetin                                                                                                     | $C_{16}H_{12}O_6$    |  | 8.4212 | Biosynthesis of secondary metabolites;                               |
| 19 | 5-Aminovaleric acid                                                                                           | $C_5H_{11}NO_2$      |  | 8.4043 | Metabolic pathways;<br>Biosynthesis of secondary                     |

|    |                                                             |                      |                                                                                       |        |                                                                                            |
|----|-------------------------------------------------------------|----------------------|---------------------------------------------------------------------------------------|--------|--------------------------------------------------------------------------------------------|
|    |                                                             |                      |                                                                                       |        | metabolites;                                                                               |
| 20 | 3-Methyl-2-buten-1-yl (2E)-3-(3,4-dihydroxyphenyl) acrylate | $C_{14}H_{16}O_4$    | 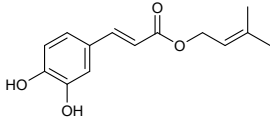   | 7.844  | Other                                                                                      |
| 21 | Benserazide                                                 | $C_{10}H_{15}N_3O_5$ |    | 7.8205 | NA                                                                                         |
| 22 | Aminolevulinic acid                                         | $C_5H_9NO_3$         |    | 7.8194 | Metabolic pathways;<br>Biosynthesis of secondary metabolites; Biosynthesis of amino acids; |
| 23 | Nicotianamine                                               | $C_{12}H_{21}N_3O_6$ |     | 7.4543 | NA                                                                                         |
| 24 | Pseudouridine                                               | $C_9H_{12}N_2O_6$    |   | 7.3607 | Metabolic pathways<br>, Pyrimidine metabolism                                              |
| 25 | Thymidine                                                   | $C_{10}H_{14}N_2O_5$ |  | 6.4196 | Pyrimidine metabolism                                                                      |

**Table S3 c. Key ESI (+) compounds in PDB media ((P-value < 0.005 and Fold change >2)**

| Ranking | Name                                                                                                                                  | Formula                                                       | Structure                                                                            | FC (fold change) number | KEGG Pathways                                                                        |
|---------|---------------------------------------------------------------------------------------------------------------------------------------|---------------------------------------------------------------|--------------------------------------------------------------------------------------|-------------------------|--------------------------------------------------------------------------------------|
| 1       | 4-Nitroacetophenone                                                                                                                   | C <sub>8</sub> H <sub>7</sub> NO <sub>3</sub>                 | 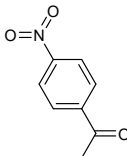   | 8.1994                  | Microbial metabolism in diverse environments; Biosynthesis of secondary metabolites; |
| 2       | Phthalazino[2,3-b]phthalazine-5,12(7H,14H)-dione                                                                                      | C <sub>16</sub> H <sub>12</sub> N <sub>2</sub> O <sub>2</sub> |    | 7.9908                  | Other                                                                                |
| 3       | (2S)-3-Methyl-2-({[(3S,4S,5R)-2,3,4-trihydroxy-5-(hydroxymethyl) tetrahydro-2-furanyl]methyl}amino)butanoic acid (non-preferred name) | C <sub>11</sub> H <sub>21</sub> NO <sub>7</sub>               |    | 7.8499                  | Metabolic pathways;                                                                  |
| 4       | 4-Amino-3-[(1-carboxyvinyl)oxy]-1,5-cyclohexadiene-1-carboxylic acid                                                                  | C <sub>10</sub> H <sub>11</sub> NO <sub>5</sub>               |   | 6.3481                  | Biosynthesis of antibiotics;                                                         |
| 5       | 1-{{[(3S,4S,5R)-2,3,4-Trihydroxy-5-(hydroxymethyl) tetrahydro-2-furanyl] methyl}-2-pyrrolidinecarboxylic acid (non-preferred name)    | C <sub>11</sub> H <sub>19</sub> NO <sub>7</sub>               |  | 5.6668                  | Metabolic pathways;                                                                  |

|   |                                                       |                      |                                                                                    |        |                                                                               |
|---|-------------------------------------------------------|----------------------|------------------------------------------------------------------------------------|--------|-------------------------------------------------------------------------------|
| 6 | 4-(Acetoxymethylnitrosamino)-1-(3-pyridyl)-1-butanone | $C_{12}H_{15}N_3O_4$ | 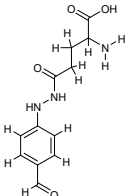 | 4.4366 |                                                                               |
| 7 | 2-Aminooctanedioic acid                               | $C_8H_{15}NO_4$      |  | 3.7087 |                                                                               |
| 8 | Phenacetin                                            | $C_{10}H_{13}NO_2$   |  | 2.479  | Biosynthesis of secondary metabolites; 2-Oxocarboxylic acid metabolism; Other |
| 9 | Pyridoxine                                            | $C_8H_{11}NO_3$      |  | 2.0298 | Metabolic pathways; Microbial metabolism in diverse environments; Other       |

Note: The key information for the compounds were presented in the above table based on Thermo Compound Discoverer analysis results.

| Ranking | Name                                                                                                                | Formula                                         | Structure                                                                            | FC (fold change) number | KEGG Pathways                                                                                                                                              |
|---------|---------------------------------------------------------------------------------------------------------------------|-------------------------------------------------|--------------------------------------------------------------------------------------|-------------------------|------------------------------------------------------------------------------------------------------------------------------------------------------------|
| 1       | 3-Hydroxypyridine                                                                                                   | C <sub>5</sub> H <sub>5</sub> NO                | 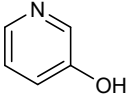   | 8.00638                 | NA                                                                                                                                                         |
| 2       | 4-Aminophenol                                                                                                       | C <sub>6</sub> H <sub>7</sub> NO                |    | 7.5924                  | Microbial metabolism in diverse environments; Other                                                                                                        |
| 3       | N-ethylmaleimide                                                                                                    | C <sub>6</sub> H <sub>7</sub> NO <sub>2</sub>   |    | 7.2775                  | Biosynthesis of secondary metabolites; Microbial metabolism in diverse environments; Other                                                                 |
| 4       | N-Tigloylglycine                                                                                                    | C <sub>7</sub> H <sub>11</sub> NO <sub>3</sub>  |    | 7.0844                  | Biosynthesis of antibiotics                                                                                                                                |
| 5       | (2R,3S,4S,5R,8R,10R,11S,12S)-2,10-Bis(hydroxymethyl)-1,6,9,13-tetraoxadispiro[4.2.4.2] tetradecane-3,4,11,12-tetrol | C <sub>12</sub> H <sub>20</sub> O <sub>10</sub> |   | 6.7645                  | NA                                                                                                                                                         |
| 6       | DL-Tyrosine                                                                                                         | C <sub>9</sub> H <sub>11</sub> NO <sub>3</sub>  |  | 6.0089                  | Metabolic pathways; Biosynthesis of antibiotics; Biosynthesis of secondary metabolites; Biosynthesis of amino acids; 2-Oxocarboxylic acid metabolism; etc. |
| 7       | Phenyl D-glucopyranosiduronic acid                                                                                  | C <sub>12</sub> H <sub>14</sub> O <sub>7</sub>  |  | 4.68097                 | NA                                                                                                                                                         |

**Table S3 d. ESI (-) Compounds in PDB media (P-value < 0.005 and Fold change >2)**

**Note:** The key metabolites were presented in the above table based on Thermo Compound Discoverer analysis.

**Table S4. Functional groups presented in the metabolites of fungal supernatant growing in MYGP & in PDB media.**

| Functional groups         | Proportion of the total functional groups<br>(Top 25 ESI (+) components in MYGP media Vs. the<br>components in PDB media.) |           | Proportion of the total functional groups<br>(Top 25 ESI (-) components in MYGP media Vs. the<br>components in PDB media.) |           |
|---------------------------|----------------------------------------------------------------------------------------------------------------------------|-----------|----------------------------------------------------------------------------------------------------------------------------|-----------|
|                           | MYGP media                                                                                                                 | PDB media | MYGP media                                                                                                                 | PDB media |
| -COOH                     | 24%                                                                                                                        | 44%       | 28%                                                                                                                        | 28%       |
| Multi phenolic hydroxyl   | 40%                                                                                                                        | 0         | 40%                                                                                                                        | 0         |
| Amide (-C=O-NH)           | 20%                                                                                                                        | 44%       | 16%                                                                                                                        | 14%       |
| Amino (-NH <sub>2</sub> ) | 8%                                                                                                                         | 22%       | 16%                                                                                                                        | 14%       |
| Carbonyl (C=O)            | 24%                                                                                                                        | 22%       | 32%                                                                                                                        | 28%       |
